# Supplementary material for: Exploration of Potential Therapeutic Targets of Diosgenin in Pulmonary Fibrosis through Network Pharmacology and Mendelian Randomization
Source: Research Square preprint supplement (doi:10.21203/rs.3.rs-5661693/v1), 2024-12-20
Supplement: Supplementary file 1 [file dea0b59f1c3bcf8658aacd17.xlsx]

## Sheet: Table S1
Diosgenin target
CDK4
ADORA1
CACNA1H
CCND1
CCR1
CDK1
CYP3A4
GRIN1
NR1I2
NTRK1
NTRK3
PDGFRB
PRCP
PTGS1
STAT3
ABCC1
ABL1
ACACA
ACACB
ADAM10
ADORA2A
ADORA2B
AKR1C3
ALK
ALOX12
ALOX5
APEX1
APP
AR
AURKB
BACE1
BCHE
BLM
BMX
BRAF
BRD4
C5AR1
CA1
CA2
CACNA1B
CCNB1
CCND2
CCND3
CCNE1
CD38
CDC25C
CDC7
CDK2
CDK6
CES1
CFTR
CHRM4
CHRM5
CLK1
CLK2
CLK4
CNR1
CNR2
CRHR1
CSF1R
CSNK2B
CTSD
CYP17A1
CYP19A1
CYP24A1
CYP2C9
CYP51A1
CYSLTR2
DCUN1D1
DPP8
DPP9
DRD3
DUSP3
EGLN1
ESR2
F11
F13A1
F7
FASN
FBP1
FFAR2
FGFR2
FGFR3
FGFR4
FGR
FKBP1A
FLT1
FLT3
FOLH1
FPR1
FPR2
GLRA1
GPR17
GPR55
GRIA2
GRIN2A
GRM1
GRM2
HCRTR1
HCRTR2
HDAC5
HMGCR
HPGDS
HPRT1
HRH4
HSD11B2
HSD17B10
HSD3B2
HSP90AB1
HTR2A
HTR2C
HTR6
HTR7
ICAM1
IGF1R
IL2
IL6ST
INSR
ITGAL
ITGB1
ITGB2
ITK
JAK2
KCNA3
KCNA5
KDM1A
KIF11
KIT
KLF5
LCK
LNPEP
LTA4H
LYN
MAP3K14
MAPK14
MAPK8
MAPK9
MAPT
MARK3
MC4R
MDM2
MDM4
MERTK
MET
METAP2
MMP1
MMP7
MMP8
MST1R
MTNR1A
MTNR1B
MTOR
NFKB1
NOS2
NOS3
NOTUM
NPC1L1
NR1H2
NR1H3
NR1H4
NR3C2
NT5E
NTRK2
NTSR2
OPRK1
OPRM1
P2RY12
P2RY2
PDE10A
PDE2A
PDE3A
PDE3B
PDE4B
PDE7A
PDGFRA
PIN1
PLAT
PLK1
PRKCB
PRKCD
PRMT1
PRMT5
PROC
PSMB1
PSMB2
PSMB9
PTK2B
PTPN1
PTPN2
PYGL
QRFPR
RASGRP3
RET
ROS1
RPS6KA1
RXRB
S1PR2
S1PR4
S1PR5
SCD
SCN2A
SCN3A
SCN4A
SERPINE1
SHH
SLC40A1
SLC6A3
SLC6A5
SLC6A9
SLC9A1
SMO
SORD
SPHK2
SRC
STING1
SYK
TACR1
TDO2
TDP1
TFPI
TIE1
TLR4
TLR8
TMPRSS6
TNK2
TOP2A
TRIM24
TRPV1
TYRO3
UGT2B7
VDR
WDR5
ZAP70

## Sheet: Table S2
Only Diosgenin target	Only Pulmonary fibrosis related-gene	Diosgenin target AND Pulmonary fibrosis related-gene
CDK4	TERT	STAT3
ADORA1	RTEL1	BRAF
CACNA1H	RTEL1-TNFRSF6B	CFTR
CCND1	PARN	DPP9
CCR1	BMPR2	ICAM1
CDK1	SFTPC	IL2
CYP3A4	ABCA3	MMP1
GRIN1	LOC110806263	NFKB1
NR1I2	SFTPB	NOS2
NTRK1	TERC	NOS3
NTRK3	SFTPA2	PDGFRA
PDGFRB	SFTPA1	SERPINE1
PRCP	MUC5B	SRC
PTGS1	CFTR-AS1	TLR4
ABCC1	TGFB1
ABL1	LOC111674472
ACACA	EIF2AK4
ACACB	SERPINA1
ADAM10	KIF21A
ADORA2A	LOC110806306
ADORA2B	TBX4
AKR1C3	FAM13A
ALK	LOC111674475
ALOX12	HMOX1
ALOX5	ENG
APEX1	CAV1
APP	FAM111B
AR	ACVRL1
AURKB	KCNK3
BACE1	DSP
BCHE	NKX2-1
BLM	TNF
BMX	FOXF1
BRD4	LOC111674477
C5AR1	MARS1
CA1	CLCN1
CA2	SFTPD
CACNA1B	MIR21
CCNB1	ATP11A
CCND2	STN1
CCND3	CSF2RA
CCNE1	IL6
CD38	HLA-DRB1
CDC25C	NF1
CDC7	NOP10
CDK2	SMAD9
CDK6	ZCCHC8
CES1	CXCL8
CHRM4	LOC113664106
CHRM5	ATP13A3
CLK1	NAF1
CLK2	MBL2
CLK4	EDNRA
CNR1	TUBB3
CNR2	ACE
CRHR1	MIR17
CSF1R	EDN1
CSNK2B	SFTA3
CTSD	IFNG
CYP17A1	LOC111674463
CYP19A1	CCN2
CYP24A1	MEG3
CYP2C9	GDF2
CYP51A1	ELN
CYSLTR2	IL1B
DCUN1D1	H19
DPP8	CPS1
DRD3	NKX2-5
DUSP3	HFE
EGLN1	HPS4
ESR2	IL10
F11	SMAD4
F13A1	LTBP4
F7	RPA1
FASN	TINF2
FBP1	CCL2
FFAR2	POT1
FGFR2	MMP9
FGFR3	LOC113633877
FGFR4	CRP
FGR	HPS1
FKBP1A	LOC102723566
FLT1	SLC34A2
FLT3	AFF4
FOLH1	EGFR
FPR1	IL13
FPR2	ELANE
GLRA1	MUC1
GPR17	SARS2
GPR55	EPHX1
GRIA2	SLC11A1
GRIN2A	MIF
GRM1	NOTCH1
GRM2	TP53
HCRTR1	PHOX2A
HCRTR2	TIMP1
HDAC5	MALAT1
HMGCR	ALB
HPGDS	DKC1
HPRT1	BMP6
HRH4	FCGR2A
HSD11B2	SMAD2
HSD17B10	SOX17
HSD3B2	PMS2
HSP90AB1	IL4
HTR2A	GJB2
HTR2C	GATA4
HTR6	NHP2
HTR7	IL1RN
IGF1R	GATA6
IL6ST	JAG1
INSR	TMEM67
ITGAL	PLG
ITGB1	PGR-AS1
ITGB2	MIR451A
ITK	MPO
JAK2	CTNNB1
KCNA3	IL5
KCNA5	SMAD3
KDM1A	HIF1A
KIF11	CP
KIT	MYRF
KLF5	AGT
LCK	COPD
LNPEP	SLC26A9
LTA4H	REN
LYN	HPS6
MAP3K14	BMPR1A
MAPK14	CSF2RB
MAPK8	TGFBR1
MAPK9	HPS5
MAPT	CSF2
MARK3	AKT1
MC4R	HYDIN
MDM2	MIR20A
MDM4	CCL18
MERTK	HGF
MET	MMP2
METAP2	TUBA1A
MMP7	MIR22
MMP8	TGFBR2
MST1R	FGF10
MTNR1A	CD36
MTNR1B	FBN1
MTOR	IL17A
NOTUM	CCL5
NPC1L1	STX1A
NR1H2	KCNN4
NR1H3	HPS3
NR1H4	CEACAM3
NR3C2	SLC9A3
NT5E	F2
NTRK2	SCGB1A1
NTSR2	RPL5
OPRK1	SPP1
OPRM1	CFM1
P2RY12	INPP5E
P2RY2	NPPB
PDE10A	FGF2
PDE2A	ACTC1
PDE3A	FENDRR
PDE3B	CCL11
PDE4B	ACTA2
PDE7A	IL1A
PIN1	PKHD1
PLAT	GCLC
PLK1	GDF1
PRKCB	CC2D2A
PRKCD	DCTN4
PRMT1	COL1A1
PRMT5	TGFB2
PROC	GSTM3
PSMB1	CXCL10
PSMB2	HFE-AS1
PSMB9	MIR204
PTK2B	TUG1
PTPN1	TPM1
PTPN2	NHLRC2
PYGL	TOLLIP
QRFPR	CCL3
RASGRP3	COL25A1
RET	HLA-B
ROS1	PDGFB
RPS6KA1	SLC6A14
RXRB	CEACAM6
S1PR2	BMP7
S1PR4	PIK3CA
S1PR5	PPARG
SCD	RPGRIP1L
SCN2A	IL18
SCN3A	MIR199A1
SCN4A	PIK3CG
SHH	PTPN11
SLC40A1	KDR
SLC6A3	CLCA4
SLC6A5	MUC5AC
SLC6A9	ZFPM2
SLC9A1	FASLG
SMO	KRAS
SORD	PTGS2
SPHK2	MIR30A
STING1	VEGFA
SYK	SOD2-OT1
TACR1	IGF1
TDO2	FN1
TDP1	AGTR1
TFPI
TIE1
TLR8
TMPRSS6
TNK2
TOP2A
TRIM24
TRPV1
TYRO3
UGT2B7
VDR
WDR5
ZAP70

## Sheet: Table S3
SNP	effect_allele.exposure	other_allele.exposure	effect_allele.outcome	other_allele.outcome	beta.exposure	beta.outcome	eaf.exposure	eaf.outcome	remove	palindromic	ambiguous	id.outcome	chr.outcome	pos.outcome	pval.outcome	se.outcome	outcome	mr_keep.outcome	pval_origin.outcome	chr.exposure	pos.exposure	se.exposure	pval.exposure	exposure	pval	mr_keep.exposure	pval_origin.exposure	id.exposure	action	SNP_index	mr_keep	samplesize.outcome
rs10016018	T	A	T	A	-0.0491475	-0.075	0.40041	0.4	FALSE	TRUE	FALSE	5gh7DR	4	102794621	0.12	0.049	Postinflammatory pulmonary fibrosis	TRUE	reported	4	101873464	0.00612245	4.97704e-16	SERPINE1	9.95405e-16	TRUE	inferred	O6bYcf	2	1	TRUE	NA
rs1050316	T	G	T	G	-0.0588129	-0.0013	0.643226	0.65	FALSE	FALSE	FALSE	5gh7DR	1	156434703	0.98	0.05	Postinflammatory pulmonary fibrosis	TRUE	reported	1	156464911	0.00630971	5.76164e-21	SERPINE1	1.15239e-20	TRUE	inferred	O6bYcf	2	1	TRUE	NA
rs10822143	T	C	T	C	0.0408562	0.019	0.496317	0.5	FALSE	FALSE	FALSE	5gh7DR	10	64887856	0.68	0.048	Postinflammatory pulmonary fibrosis	TRUE	reported	10	63128096	0.0059876	4.44341e-12	SERPINE1	8.88587e-12	TRUE	inferred	O6bYcf	2	1	TRUE	NA
rs114694170	C	T	C	T	0.141887	0.14	0.0560047	0.06	FALSE	FALSE	FALSE	5gh7DR	5	88180196	0.16	0.1	Postinflammatory pulmonary fibrosis	TRUE	reported	5	88884379	0.0131845	2.61127e-27	SERPINE1	5.22396e-27	TRUE	inferred	O6bYcf	2	1	TRUE	NA
rs11794772	A	G	A	G	-0.0568183	-0.015	0.258122	0.26	FALSE	FALSE	FALSE	5gh7DR	9	99118445	0.79	0.055	Postinflammatory pulmonary fibrosis	TRUE	reported	9	96356163	0.00686291	6.20866e-17	SERPINE1	1.24165e-16	TRUE	inferred	O6bYcf	2	1	TRUE	NA
rs12445050	T	C	T	C	0.0868502	-0.061	0.133949	0.14	FALSE	FALSE	FALSE	5gh7DR	16	81870969	0.38	0.069	Postinflammatory pulmonary fibrosis	TRUE	reported	16	81837364	0.00880768	3.07984e-23	SERPINE1	6.16027e-23	TRUE	inferred	O6bYcf	2	1	TRUE	NA
rs13236689	G	T	G	T	0.0580785	0.027	0.416968	0.41	FALSE	FALSE	FALSE	5gh7DR	7	80236014	0.58	0.048	Postinflammatory pulmonary fibrosis	TRUE	reported	7	80606698	0.00608727	7.07468e-22	SERPINE1	1.41482e-21	TRUE	inferred	O6bYcf	2	1	TRUE	NA
rs13412535	A	G	A	G	-0.0607397	0.0062	0.222244	0.23	FALSE	FALSE	FALSE	5gh7DR	2	224874874	0.91	0.057	Postinflammatory pulmonary fibrosis	TRUE	reported	2	224010157	0.00722805	2.16994e-17	SERPINE1	4.3391e-17	TRUE	inferred	O6bYcf	2	1	TRUE	NA
rs1354034	C	T	C	T	-0.117281	0.048	0.589112	0.6	FALSE	FALSE	FALSE	5gh7DR	3	56849749	0.32	0.049	Postinflammatory pulmonary fibrosis	TRUE	reported	3	56815721	0.0061245	4.88775e-82	SERPINE1	9.78588e-82	TRUE	inferred	O6bYcf	2	1	TRUE	NA
rs151234	C	G	C	G	0.0624291	0.078	0.132352	0.13	FALSE	TRUE	FALSE	5gh7DR	16	28505660	0.27	0.071	Postinflammatory pulmonary fibrosis	TRUE	reported	16	28494339	0.00891196	1.23412e-12	SERPINE1	2.46831e-12	TRUE	inferred	O6bYcf	2	1	TRUE	NA
rs2227674	G	A	G	A	-0.10871	0.061	0.210242	0.2	FALSE	FALSE	FALSE	5gh7DR	7	100776208	0.31	0.06	Postinflammatory pulmonary fibrosis	TRUE	reported	7	101132927	0.00744994	1.57753e-48	SERPINE1	3.15355e-48	TRUE	inferred	O6bYcf	2	1	TRUE	NA
rs2522051	C	T	C	T	0.055101	0.028	0.459451	0.45	FALSE	FALSE	FALSE	5gh7DR	5	131797578	0.55	0.048	Postinflammatory pulmonary fibrosis	TRUE	reported	5	132461886	0.00606547	5.21484e-20	SERPINE1	1.04304e-19	TRUE	inferred	O6bYcf	2	1	TRUE	NA
rs34377578	C	A	C	A	0.0756171	0.044	0.24431	0.25	FALSE	FALSE	FALSE	5gh7DR	10	104336426	0.42	0.055	Postinflammatory pulmonary fibrosis	TRUE	reported	10	102576669	0.00700938	1.96144e-27	SERPINE1	3.92283e-27	TRUE	inferred	O6bYcf	2	1	TRUE	NA
rs4608137	A	G	A	G	-0.0431326	0.041	0.475261	0.49	FALSE	FALSE	FALSE	5gh7DR	12	6293373	0.39	0.048	Postinflammatory pulmonary fibrosis	TRUE	reported	12	6184207	0.00603814	4.55388e-13	SERPINE1	9.10752e-13	TRUE	inferred	O6bYcf	2	1	TRUE	NA
rs60757417	G	C	G	C	-0.146052	0.18	0.0624353	0.06	FALSE	TRUE	FALSE	5gh7DR	9	135864436	0.073	0.1	Postinflammatory pulmonary fibrosis	TRUE	reported	9	132989049	0.0125606	1.48855e-31	SERPINE1	2.97577e-31	TRUE	inferred	O6bYcf	2	1	TRUE	NA
rs6081565	A	G	A	G	0.0711309	-0.045	0.349593	0.35	FALSE	FALSE	FALSE	5gh7DR	20	19287904	0.36	0.05	Postinflammatory pulmonary fibrosis	TRUE	reported	20	19307260	0.00629872	7.1121e-30	SERPINE1	1.42233e-29	TRUE	inferred	O6bYcf	2	1	TRUE	NA
rs61751937	C	G	C	G	0.134132	0.082	0.0275384	0.029	FALSE	TRUE	FALSE	5gh7DR	9	113312231	0.56	0.14	Postinflammatory pulmonary fibrosis	TRUE	reported	9	110549951	0.0182432	9.73118e-14	SERPINE1	1.94626e-13	TRUE	inferred	O6bYcf	2	1	TRUE	NA
rs61978213	A	G	A	G	0.131774	-0.12	0.0401553	0.041	FALSE	FALSE	FALSE	5gh7DR	14	70653758	0.33	0.12	Postinflammatory pulmonary fibrosis	TRUE	reported	14	70187041	0.0151784	1.94984e-18	SERPINE1	3.90032e-18	TRUE	inferred	O6bYcf	2	1	TRUE	NA
rs6580981	A	G	A	G	0.0565324	0.075	0.476149	0.46	FALSE	FALSE	FALSE	5gh7DR	12	54723028	0.12	0.048	Postinflammatory pulmonary fibrosis	TRUE	reported	12	54329244	0.00610895	1.08093e-20	SERPINE1	2.16172e-20	TRUE	inferred	O6bYcf	2	1	TRUE	NA
rs6993770	T	A	T	A	-0.15157	0.0034	0.291855	0.28	FALSE	TRUE	FALSE	5gh7DR	8	106581528	0.95	0.053	Postinflammatory pulmonary fibrosis	TRUE	reported	8	105569300	0.00659458	3.36727e-117	SERPINE1	6.72977e-117	TRUE	inferred	O6bYcf	2	1	TRUE	NA
rs7618405	A	C	A	C	-0.0640182	-0.0046	0.204005	0.21	FALSE	FALSE	FALSE	5gh7DR	3	18250509	0.94	0.059	Postinflammatory pulmonary fibrosis	TRUE	reported	3	18209017	0.00747556	5.46671e-18	SERPINE1	1.0932e-17	TRUE	inferred	O6bYcf	2	1	TRUE	NA
rs78909033	A	G	A	G	-0.089021	0.075	0.128784	0.13	FALSE	FALSE	FALSE	5gh7DR	2	241510903	0.28	0.07	Postinflammatory pulmonary fibrosis	TRUE	reported	2	240571486	0.00897003	1.63241e-23	SERPINE1	3.26513e-23	TRUE	inferred	O6bYcf	2	1	TRUE	NA
rs7896897	A	G	A	G	0.0444943	0.071	0.330269	0.33	FALSE	FALSE	FALSE	5gh7DR	10	3140734	0.17	0.051	Postinflammatory pulmonary fibrosis	TRUE	reported	10	3098542	0.00646686	2.98516e-12	SERPINE1	5.97035e-12	TRUE	inferred	O6bYcf	2	1	TRUE	NA
rs892090	G	T	G	T	0.149138	-0.088	0.831894	0.83	FALSE	FALSE	FALSE	5gh7DR	19	55539072	0.17	0.064	Postinflammatory pulmonary fibrosis	TRUE	reported	19	55027704	0.00806112	1.01522e-76	SERPINE1	2.03002e-76	TRUE	inferred	O6bYcf	2	1	TRUE	NA
rs9378249	G	T	G	T	-0.0864297	-0.035	0.0623115	0.066	FALSE	FALSE	FALSE	5gh7DR	6	31327701	0.71	0.097	Postinflammatory pulmonary fibrosis	TRUE	reported	6	31359924	0.0124086	1.63845e-12	SERPINE1	3.27718e-12	TRUE	inferred	O6bYcf	2	1	TRUE	NA
rs1049728	C	G	C	G	-0.167984	-0.097	0.0573673	0.06	FALSE	TRUE	FALSE	5gh7DR	11	65421117	0.34	0.1	Postinflammatory pulmonary fibrosis	TRUE	reported	11	65653646	0.0122915	8.02773e-43	ICAM1	1.6062e-42	TRUE	inferred	SVayis	2	1	TRUE	NA
rs186021206	A	G	A	G	0.599872	0.31	0.00602626	0.0066	FALSE	FALSE	FALSE	5gh7DR	17	7069412	0.33	0.32	Postinflammatory pulmonary fibrosis	TRUE	reported	17	7166093	0.03981	1.30733e-51	ICAM1	2.61517e-51	TRUE	inferred	SVayis	2	1	TRUE	NA
rs3136642	G	A	G	A	-0.0557414	-0.055	0.371438	0.37	FALSE	FALSE	FALSE	5gh7DR	19	39398416	0.27	0.05	Postinflammatory pulmonary fibrosis	TRUE	reported	19	38907776	0.00629751	4.32375e-19	ICAM1	8.64769e-19	TRUE	inferred	SVayis	2	1	TRUE	NA
rs3184504	C	T	C	T	-0.0818071	-0.062	0.539105	0.52	FALSE	FALSE	FALSE	5gh7DR	12	111884608	0.19	0.048	Postinflammatory pulmonary fibrosis	TRUE	reported	12	111446804	0.00572267	1.17102e-46	ICAM1	2.34207e-46	TRUE	inferred	SVayis	2	1	TRUE	NA
rs34434834	A	G	A	G	0.135206	0.19	0.031123	0.034	FALSE	FALSE	FALSE	5gh7DR	11	126307796	0.16	0.13	Postinflammatory pulmonary fibrosis	TRUE	reported	11	126437901	0.0162458	4.30562e-17	ICAM1	8.60994e-17	TRUE	inferred	SVayis	2	1	TRUE	NA
rs1070073	G	T	G	T	0.128552	-0.058	0.681159	0.67	FALSE	FALSE	FALSE	5gh7DR	12	104000319	0.26	0.051	Postinflammatory pulmonary fibrosis	TRUE	reported	12	103606541	0.00635417	2.60509e-91	PDGFRA	5.20955e-91	TRUE	inferred	61BtBW	2	1	TRUE	NA
rs11260029	C	T	C	T	-0.0465225	0.08	0.274896	0.28	FALSE	FALSE	FALSE	5gh7DR	19	7827576	0.13	0.053	Postinflammatory pulmonary fibrosis	TRUE	reported	19	7762690	0.00660463	9.34513e-13	PDGFRA	1.86896e-12	TRUE	inferred	61BtBW	2	1	TRUE	NA
rs12592898	G	A	G	A	-0.0662065	-0.026	0.868327	0.87	FALSE	FALSE	FALSE	5gh7DR	15	79229199	0.71	0.071	Postinflammatory pulmonary fibrosis	TRUE	reported	15	78936857	0.00869325	1.30979e-14	PDGFRA	2.61939e-14	TRUE	inferred	61BtBW	2	1	TRUE	NA
rs186021206	A	G	A	G	0.348644	0.31	0.00603624	0.0066	FALSE	FALSE	FALSE	5gh7DR	17	7069412	0.33	0.32	Postinflammatory pulmonary fibrosis	TRUE	reported	17	7166093	0.0414211	1.9302e-17	PDGFRA	3.86011e-17	TRUE	inferred	61BtBW	2	1	TRUE	NA
rs35597368	C	T	C	T	-0.425154	-0.0084	0.114406	0.11	FALSE	FALSE	FALSE	5gh7DR	4	55139771	0.91	0.077	Postinflammatory pulmonary fibrosis	TRUE	reported	4	54273604	0.00936027	0	PDGFRA	0	TRUE	inferred	61BtBW	2	1	TRUE	NA
rs6913664	T	C	T	C	0.0566476	-0.087	0.483115	0.47	FALSE	FALSE	FALSE	5gh7DR	6	32295874	0.068	0.048	Postinflammatory pulmonary fibrosis	TRUE	reported	6	32328097	0.00586838	2.38641e-22	PDGFRA	4.77309e-22	TRUE	inferred	61BtBW	2	1	TRUE	NA
rs738408	T	C	T	C	0.0543939	-0.0028	0.214642	0.22	FALSE	FALSE	FALSE	5gh7DR	22	44324730	0.96	0.058	Postinflammatory pulmonary fibrosis	TRUE	reported	22	43928850	0.00707763	7.63034e-15	PDGFRA	1.52616e-14	TRUE	inferred	61BtBW	2	1	TRUE	NA
rs8134160	T	A	T	A	0.0446932	0.048	0.274852	0.26	FALSE	TRUE	FALSE	5gh7DR	21	42541202	0.38	0.055	Postinflammatory pulmonary fibrosis	TRUE	reported	21	41169275	0.00661889	7.27243e-12	PDGFRA	1.45445e-11	TRUE	inferred	61BtBW	2	1	TRUE	NA
rs887048	C	T	C	T	0.0427824	0.067	0.603842	0.59	FALSE	FALSE	FALSE	5gh7DR	7	76060235	0.17	0.048	Postinflammatory pulmonary fibrosis	TRUE	reported	7	76430918	0.00594864	3.19331e-13	PDGFRA	6.38705e-13	TRUE	inferred	61BtBW	2	1	TRUE	NA
rs10883368	G	A	G	A	0.0653425	-0.003	0.271888	0.27	FALSE	FALSE	FALSE	5gh7DR	10	101289998	0.95	0.053	Postinflammatory pulmonary fibrosis	TRUE	reported	10	99530241	0.00618895	2.33422e-26	MMP1	4.66767e-26	TRUE	inferred	yjkEyB	2	1	TRUE	NA
rs11056780	C	T	C	T	0.0442297	-0.0011	0.576506	0.58	FALSE	FALSE	FALSE	5gh7DR	12	8141523	0.98	0.048	Postinflammatory pulmonary fibrosis	TRUE	reported	12	7988927	0.00556037	8.99626e-16	MMP1	1.79929e-15	TRUE	inferred	yjkEyB	2	1	TRUE	NA
rs12136856	G	C	G	C	0.0888986	-0.00042	0.643715	0.65	FALSE	TRUE	FALSE	5gh7DR	1	156473114	0.99	0.05	Postinflammatory pulmonary fibrosis	TRUE	reported	1	156503322	0.00579308	1.89362e-53	MMP1	3.78704e-53	TRUE	inferred	yjkEyB	2	1	TRUE	NA
rs12445050	T	C	T	C	0.0722634	-0.061	0.133923	0.14	FALSE	FALSE	FALSE	5gh7DR	16	81870969	0.38	0.069	Postinflammatory pulmonary fibrosis	TRUE	reported	16	81837364	0.00805987	1.53981e-19	MMP1	3.07964e-19	TRUE	inferred	yjkEyB	2	1	TRUE	NA
rs12468278	G	A	G	A	-0.0568448	-0.0045	0.270082	0.26	FALSE	FALSE	FALSE	5gh7DR	2	68645870	0.94	0.055	Postinflammatory pulmonary fibrosis	TRUE	reported	2	68418738	0.00624678	4.52257e-20	MMP1	9.04482e-20	TRUE	inferred	yjkEyB	2	1	TRUE	NA
rs1344674	G	A	G	A	-0.0409181	0.027	0.452591	0.45	FALSE	FALSE	FALSE	5gh7DR	3	141125186	0.57	0.048	Postinflammatory pulmonary fibrosis	TRUE	reported	3	141406344	0.00556478	9.68679e-14	MMP1	1.93731e-13	TRUE	inferred	yjkEyB	2	1	TRUE	NA
rs150813342	T	C	T	C	-0.239471	-0.021	0.00750023	0.0082	FALSE	FALSE	FALSE	5gh7DR	9	135864513	0.94	0.28	Postinflammatory pulmonary fibrosis	TRUE	reported	9	132989126	0.0328594	1.5759e-13	MMP1	3.1521e-13	TRUE	inferred	yjkEyB	2	1	TRUE	NA
rs188708679	G	T	G	T	-0.377921	0.28	0.00323698	0.0031	FALSE	FALSE	FALSE	5gh7DR	4	10434414	0.54	0.45	Postinflammatory pulmonary fibrosis	TRUE	reported	4	10432790	0.0502482	2.71617e-14	MMP1	5.43125e-14	TRUE	inferred	yjkEyB	2	1	TRUE	NA
rs2546980	C	T	C	T	-0.0549458	-0.045	0.702475	0.71	FALSE	FALSE	FALSE	5gh7DR	5	159595476	0.39	0.053	Postinflammatory pulmonary fibrosis	TRUE	reported	5	160168469	0.00602573	3.80751e-20	MMP1	7.61553e-20	TRUE	inferred	yjkEyB	2	1	TRUE	NA
rs274555	T	C	T	C	0.0447527	0.0064	0.406605	0.4	FALSE	FALSE	FALSE	5gh7DR	5	131722951	0.9	0.049	Postinflammatory pulmonary fibrosis	TRUE	reported	5	132387259	0.00564659	1.1351e-15	MMP1	2.27039e-15	TRUE	inferred	yjkEyB	2	1	TRUE	NA
rs3184504	C	T	C	T	-0.0402159	-0.062	0.539328	0.52	FALSE	FALSE	FALSE	5gh7DR	12	111884608	0.19	0.048	Postinflammatory pulmonary fibrosis	TRUE	reported	12	111446804	0.00558805	3.08282e-13	MMP1	6.16595e-13	TRUE	inferred	yjkEyB	2	1	TRUE	NA
rs3811444	T	C	T	C	-0.0421633	0.04	0.324831	0.33	FALSE	FALSE	FALSE	5gh7DR	1	248039451	0.43	0.051	Postinflammatory pulmonary fibrosis	TRUE	reported	1	247876149	0.00587813	3.67099e-13	MMP1	7.34176e-13	TRUE	inferred	yjkEyB	2	1	TRUE	NA
rs471994	A	G	A	G	-0.456829	-0.051	0.369395	0.36	FALSE	FALSE	FALSE	5gh7DR	11	102697731	0.31	0.05	Postinflammatory pulmonary fibrosis	TRUE	reported	11	102827000	0.00643224	0	MMP1	0	TRUE	inferred	yjkEyB	2	1	TRUE	NA
rs4966015	T	G	T	G	-0.0572434	-0.0068	0.148828	0.14	FALSE	FALSE	FALSE	5gh7DR	15	99248132	0.92	0.068	Postinflammatory pulmonary fibrosis	TRUE	reported	15	98704903	0.00767929	4.51879e-14	MMP1	9.03858e-14	TRUE	inferred	yjkEyB	2	1	TRUE	NA
rs559972	T	C	T	C	0.037954	0.036	0.471636	0.48	FALSE	FALSE	FALSE	5gh7DR	17	27814496	0.45	0.048	Postinflammatory pulmonary fibrosis	TRUE	reported	17	29487478	0.00552003	3.08459e-12	MMP1	6.16879e-12	TRUE	inferred	yjkEyB	2	1	TRUE	NA
rs6081565	A	G	A	G	0.0590995	-0.045	0.350096	0.35	FALSE	FALSE	FALSE	5gh7DR	20	19287904	0.36	0.05	Postinflammatory pulmonary fibrosis	TRUE	reported	20	19307260	0.00576431	5.75665e-25	MMP1	1.15133e-24	TRUE	inferred	yjkEyB	2	1	TRUE	NA
rs6993770	T	A	T	A	-0.151703	0.0034	0.291921	0.28	FALSE	TRUE	FALSE	5gh7DR	8	106581528	0.95	0.053	Postinflammatory pulmonary fibrosis	TRUE	reported	8	105569300	0.00603601	1.08432e-139	MMP1	2.1677e-139	TRUE	inferred	yjkEyB	2	1	TRUE	NA
rs76036957	A	G	A	G	0.337322	0.19	0.00902086	0.0089	FALSE	FALSE	FALSE	5gh7DR	2	113496453	0.45	0.26	Postinflammatory pulmonary fibrosis	TRUE	reported	2	112738876	0.0291919	3.46908e-31	MMP1	6.93585e-31	TRUE	inferred	yjkEyB	2	1	TRUE	NA
rs7618405	A	C	A	C	-0.0464711	-0.0046	0.204313	0.21	FALSE	FALSE	FALSE	5gh7DR	3	18250509	0.94	0.059	Postinflammatory pulmonary fibrosis	TRUE	reported	3	18209017	0.00682412	4.88569e-12	MMP1	9.77237e-12	TRUE	inferred	yjkEyB	2	1	TRUE	NA
rs79977579	A	C	A	C	0.0934783	0.1	0.0944033	0.099	FALSE	FALSE	FALSE	5gh7DR	12	54694560	0.19	0.08	Postinflammatory pulmonary fibrosis	TRUE	reported	12	54300776	0.00947301	2.86889e-23	MMP1	5.73852e-23	TRUE	inferred	yjkEyB	2	1	TRUE	NA
rs8026714	A	G	A	G	-0.0583976	-0.0036	0.136233	0.13	FALSE	FALSE	FALSE	5gh7DR	15	91522253	0.96	0.071	Postinflammatory pulmonary fibrosis	TRUE	reported	15	90979023	0.00802045	1.6557e-13	MMP1	3.31131e-13	TRUE	inferred	yjkEyB	2	1	TRUE	NA
rs892090	G	T	G	T	0.105211	-0.088	0.831912	0.83	FALSE	FALSE	FALSE	5gh7DR	19	55539072	0.17	0.064	Postinflammatory pulmonary fibrosis	TRUE	reported	19	55027704	0.00737213	1.64821e-46	MMP1	3.29686e-46	TRUE	inferred	yjkEyB	2	1	TRUE	NA
rs9985030	A	G	A	G	-0.0673569	-0.12	0.0841956	0.088	FALSE	FALSE	FALSE	5gh7DR	21	36429268	0.15	0.085	Postinflammatory pulmonary fibrosis	TRUE	reported	21	35056971	0.00994793	6.39714e-12	MMP1	1.27938e-11	TRUE	inferred	yjkEyB	2	1	TRUE	NA
rs1354034	C	T	C	T	0.0533567	0.048	0.588576	0.6	FALSE	FALSE	FALSE	5gh7DR	3	56849749	0.32	0.049	Postinflammatory pulmonary fibrosis	TRUE	reported	3	56815721	0.00625658	7.43896e-18	NFKB1	1.48765e-17	TRUE	inferred	WsmYaa	2	1	TRUE	NA
rs230509	A	G	A	G	-0.119493	-0.079	0.663425	0.65	FALSE	FALSE	FALSE	5gh7DR	4	103478265	0.12	0.05	Postinflammatory pulmonary fibrosis	TRUE	reported	4	102557108	0.00654372	8.50263e-75	NFKB1	1.70177e-74	TRUE	inferred	WsmYaa	2	1	TRUE	NA
rs342293	G	C	G	C	-0.0441637	0.022	0.45432	0.46	FALSE	TRUE	TRUE	5gh7DR	7	106372219	0.64	0.048	Postinflammatory pulmonary fibrosis	TRUE	reported	7	106731773	0.00613646	3.07907e-13	NFKB1	6.15886e-13	TRUE	inferred	WsmYaa	2	1	FALSE	NA
rs6580981	A	G	A	G	0.0507117	0.075	0.476524	0.46	FALSE	FALSE	FALSE	5gh7DR	12	54723028	0.12	0.048	Postinflammatory pulmonary fibrosis	TRUE	reported	12	54329244	0.00626303	2.81675e-16	NFKB1	5.63378e-16	TRUE	inferred	WsmYaa	2	1	TRUE	NA
rs1800783	T	A	T	A	0.0479463	-0.036	0.619559	0.62	FALSE	TRUE	FALSE	5gh7DR	7	150689397	0.46	0.049	Postinflammatory pulmonary fibrosis	TRUE	reported	7	150992309	0.00630496	1.42963e-14	NOS3	2.85957e-14	TRUE	inferred	KN2VmP	2	1	TRUE	NA
rs1864163	A	G	A	G	0.0472306	-0.065	0.261517	0.26	FALSE	FALSE	FALSE	5gh7DR	16	56997233	0.23	0.054	Postinflammatory pulmonary fibrosis	TRUE	reported	16	56963321	0.00691844	4.34238e-12	NOS3	8.6836e-12	TRUE	inferred	KN2VmP	2	1	TRUE	NA
rs2412973	A	C	A	C	-0.0421463	0.044	0.454041	0.44	FALSE	FALSE	FALSE	5gh7DR	22	30529631	0.36	0.048	Postinflammatory pulmonary fibrosis	TRUE	reported	22	30133642	0.00613517	3.21861e-12	NOS3	6.43724e-12	TRUE	inferred	KN2VmP	2	1	TRUE	NA
rs3184504	C	T	C	T	-0.050065	-0.062	0.538925	0.52	FALSE	FALSE	FALSE	5gh7DR	12	111884608	0.19	0.048	Postinflammatory pulmonary fibrosis	TRUE	reported	12	111446804	0.00619519	3.2048e-16	NOS3	6.40914e-16	TRUE	inferred	KN2VmP	2	1	TRUE	NA
rs529565	C	T	C	T	0.0628957	0.033	0.324524	0.32	FALSE	FALSE	FALSE	5gh7DR	9	136149500	0.52	0.051	Postinflammatory pulmonary fibrosis	TRUE	reported	9	133274084	0.00648573	1.5441e-22	NOS3	3.08816e-22	TRUE	inferred	KN2VmP	2	1	TRUE	NA
rs6415128	A	G	A	G	0.0509559	0.065	0.565096	0.56	FALSE	FALSE	FALSE	5gh7DR	6	32330894	0.18	0.048	Postinflammatory pulmonary fibrosis	TRUE	reported	6	32363117	0.00614556	5.59154e-17	NOS3	1.11841e-16	TRUE	inferred	KN2VmP	2	1	TRUE	NA
rs7572209	C	T	C	T	-0.079465	0.12	0.19674	0.2	FALSE	FALSE	FALSE	5gh7DR	2	86090072	0.036	0.06	Postinflammatory pulmonary fibrosis	TRUE	reported	2	85862949	0.00767173	1.92143e-25	NOS3	3.84238e-25	TRUE	inferred	KN2VmP	2	1	TRUE	NA
rs4986791	T	C	T	C	-0.330605	-0.035	0.0614398	0.063	FALSE	FALSE	FALSE	5gh7DR	9	120475602	0.72	0.097	Postinflammatory pulmonary fibrosis	TRUE	reported	9	117713324	0.0131308	3.50424e-140	TLR4	7.01455e-140	TRUE	inferred	cQEHpx	2	1	TRUE	NA
rs635634	T	C	T	C	-0.0886011	0.098	0.182019	0.19	FALSE	FALSE	FALSE	5gh7DR	9	136155000	0.11	0.062	Postinflammatory pulmonary fibrosis	TRUE	reported	9	133279427	0.00819781	1.57911e-27	TLR4	3.15791e-27	TRUE	inferred	cQEHpx	2	1	TRUE	NA

## Sheet: Table S4
SNP	effect_allele.exposure	other_allele.exposure	effect_allele.outcome	other_allele.outcome	beta.exposure	beta.outcome	eaf.exposure	eaf.outcome	remove	palindromic	ambiguous	id.outcome	chr	pos	se.outcome	samplesize.outcome	pval.outcome	outcome	originalname.outcome	outcome.deprecated	mr_keep.outcome	data_source.outcome	chr.exposure	pos.exposure	se.exposure	pval.exposure	exposure	pval	mr_keep.exposure	pval_origin.exposure	id.exposure	action	SNP_index	mr_keep
rs10016018	T	A	T	A	-0.0491475	-0.0671	0.40041	0.360337	FALSE	TRUE	FALSE	ebi-a-GCST90018908	4	102794621	0.0356	469126	0.0595594	Pulmonary fibrosis || id:ebi-a-GCST90018908	Pulmonary fibrosis	Pulmonary fibrosis || ||	TRUE	igd	4	101873464	0.00612245	4.97704e-16	SERPINE1	9.95405e-16	TRUE	inferred	O6bYcf	2	1	TRUE
rs1050316	T	G	T	G	-0.0588129	-0.0001	0.643226	0.658599	FALSE	FALSE	FALSE	ebi-a-GCST90018908	1	156434703	0.0362	469126	0.9971	Pulmonary fibrosis || id:ebi-a-GCST90018908	Pulmonary fibrosis	Pulmonary fibrosis || ||	TRUE	igd	1	156464911	0.00630971	5.76164e-21	SERPINE1	1.15239e-20	TRUE	inferred	O6bYcf	2	1	TRUE
rs10822143	T	C	T	C	0.0408562	0.0686	0.496317	0.514959	FALSE	FALSE	FALSE	ebi-a-GCST90018908	10	64887856	0.0412	469126	0.0959091	Pulmonary fibrosis || id:ebi-a-GCST90018908	Pulmonary fibrosis	Pulmonary fibrosis || ||	TRUE	igd	10	63128096	0.0059876	4.44341e-12	SERPINE1	8.88587e-12	TRUE	inferred	O6bYcf	2	1	TRUE
rs114694170	C	T	C	T	0.141887	0.0304	0.0560047	0.0584119	FALSE	FALSE	FALSE	ebi-a-GCST90018908	5	88180196	0.0779	469126	0.6967	Pulmonary fibrosis || id:ebi-a-GCST90018908	Pulmonary fibrosis	Pulmonary fibrosis || ||	TRUE	igd	5	88884379	0.0131845	2.61127e-27	SERPINE1	5.22396e-27	TRUE	inferred	O6bYcf	2	1	TRUE
rs11794772	A	G	A	G	-0.0568183	-0.0173	0.258122	0.333145	FALSE	FALSE	FALSE	ebi-a-GCST90018908	9	99118445	0.0392	469126	0.6583	Pulmonary fibrosis || id:ebi-a-GCST90018908	Pulmonary fibrosis	Pulmonary fibrosis || ||	TRUE	igd	9	96356163	0.00686291	6.20866e-17	SERPINE1	1.24165e-16	TRUE	inferred	O6bYcf	2	1	TRUE
rs12445050	T	C	T	C	0.0868502	-0.0142	0.133949	0.127818	FALSE	FALSE	FALSE	ebi-a-GCST90018908	16	81870969	0.0514	469126	0.7819	Pulmonary fibrosis || id:ebi-a-GCST90018908	Pulmonary fibrosis	Pulmonary fibrosis || ||	TRUE	igd	16	81837364	0.00880768	3.07984e-23	SERPINE1	6.16027e-23	TRUE	inferred	O6bYcf	2	1	TRUE
rs13236689	G	T	G	T	0.0580785	-0.0157	0.416968	0.464167	FALSE	FALSE	FALSE	ebi-a-GCST90018908	7	80236014	0.0352	469126	0.6543	Pulmonary fibrosis || id:ebi-a-GCST90018908	Pulmonary fibrosis	Pulmonary fibrosis || ||	TRUE	igd	7	80606698	0.00608727	7.07468e-22	SERPINE1	1.41482e-21	TRUE	inferred	O6bYcf	2	1	TRUE
rs13412535	A	G	A	G	-0.0607397	-0.0486	0.222244	0.219032	FALSE	FALSE	FALSE	ebi-a-GCST90018908	2	224874874	0.0422	469126	0.2492	Pulmonary fibrosis || id:ebi-a-GCST90018908	Pulmonary fibrosis	Pulmonary fibrosis || ||	TRUE	igd	2	224010157	0.00722805	2.16994e-17	SERPINE1	4.3391e-17	TRUE	inferred	O6bYcf	2	1	TRUE
rs1354034	C	T	C	T	-0.117281	0.0386	0.589112	0.605125	FALSE	FALSE	FALSE	ebi-a-GCST90018908	3	56849749	0.0361	469126	0.2854	Pulmonary fibrosis || id:ebi-a-GCST90018908	Pulmonary fibrosis	Pulmonary fibrosis || ||	TRUE	igd	3	56815721	0.0061245	4.88775e-82	SERPINE1	9.78588e-82	TRUE	inferred	O6bYcf	2	1	TRUE
rs151234	C	G	C	G	0.0624291	-0.0083	0.132352	0.127805	FALSE	TRUE	FALSE	ebi-a-GCST90018908	16	28505660	0.0541	469126	0.8781	Pulmonary fibrosis || id:ebi-a-GCST90018908	Pulmonary fibrosis	Pulmonary fibrosis || ||	TRUE	igd	16	28494339	0.00891196	1.23412e-12	SERPINE1	2.46831e-12	TRUE	inferred	O6bYcf	2	1	TRUE
rs2227674	G	A	G	A	-0.10871	-0.0128	0.210242	0.243258	FALSE	FALSE	FALSE	ebi-a-GCST90018908	7	100776208	0.0435	469126	0.768399	Pulmonary fibrosis || id:ebi-a-GCST90018908	Pulmonary fibrosis	Pulmonary fibrosis || ||	TRUE	igd	7	101132927	0.00744994	1.57753e-48	SERPINE1	3.15355e-48	TRUE	inferred	O6bYcf	2	1	TRUE
rs2522051	C	T	C	T	0.055101	0.019	0.459451	0.540993	FALSE	FALSE	FALSE	ebi-a-GCST90018908	5	131797578	0.0351	469126	0.5888	Pulmonary fibrosis || id:ebi-a-GCST90018908	Pulmonary fibrosis	Pulmonary fibrosis || ||	TRUE	igd	5	132461886	0.00606547	5.21484e-20	SERPINE1	1.04304e-19	TRUE	inferred	O6bYcf	2	1	TRUE
rs3002416	T	C	T	C	-0.0406822	-0.0495	0.408382	0.46812	FALSE	FALSE	FALSE	ebi-a-GCST90018908	X	39710195	0.0289	469126	0.0869701	Pulmonary fibrosis || id:ebi-a-GCST90018908	Pulmonary fibrosis	Pulmonary fibrosis || ||	TRUE	igd	23	39850941	0.00528015	6.55533e-15	SERPINE1	1.31099e-14	TRUE	inferred	O6bYcf	2	1	TRUE
rs4608137	A	G	A	G	-0.0431326	-0.01	0.475261	0.458967	FALSE	FALSE	FALSE	ebi-a-GCST90018908	12	6293373	0.0349	469126	0.7743	Pulmonary fibrosis || id:ebi-a-GCST90018908	Pulmonary fibrosis	Pulmonary fibrosis || ||	TRUE	igd	12	6184207	0.00603814	4.55388e-13	SERPINE1	9.10752e-13	TRUE	inferred	O6bYcf	2	1	TRUE
rs4827870	A	T	A	T	-0.0484713	-0.0186	0.618734	0.545167	FALSE	TRUE	TRUE	ebi-a-GCST90018908	X	99936929	0.0295	469126	0.5284	Pulmonary fibrosis || id:ebi-a-GCST90018908	Pulmonary fibrosis	Pulmonary fibrosis || ||	TRUE	igd	23	100681932	0.00514218	2.12575e-21	SERPINE1	4.25109e-21	TRUE	inferred	O6bYcf	2	1	FALSE
rs59001897	A	T	A	T	0.0636168	0.1648	0.184185	0.174309	FALSE	TRUE	FALSE	ebi-a-GCST90018908	15	65160392	0.0581	469126	0.00456899	Pulmonary fibrosis || id:ebi-a-GCST90018908	Pulmonary fibrosis	Pulmonary fibrosis || ||	TRUE	igd	15	64868193	0.00785403	2.75038e-16	SERPINE1	5.50047e-16	TRUE	inferred	O6bYcf	2	1	TRUE
rs5980948	T	C	T	C	0.0645059	-0.0066	0.19448	0.220639	FALSE	FALSE	FALSE	ebi-a-GCST90018908	X	69701403	0.0341	469126	0.847	Pulmonary fibrosis || id:ebi-a-GCST90018908	Pulmonary fibrosis	Pulmonary fibrosis || ||	TRUE	igd	23	70481553	0.00626407	3.60599e-25	SERPINE1	7.21274e-25	TRUE	inferred	O6bYcf	2	1	TRUE
rs60757417	G	C	G	C	-0.146052	0.0637	0.0624353	0.0697835	FALSE	TRUE	FALSE	ebi-a-GCST90018908	9	135864436	0.0707	469126	0.3675	Pulmonary fibrosis || id:ebi-a-GCST90018908	Pulmonary fibrosis	Pulmonary fibrosis || ||	TRUE	igd	9	132989049	0.0125606	1.48855e-31	SERPINE1	2.97577e-31	TRUE	inferred	O6bYcf	2	1	TRUE
rs6081565	A	G	A	G	0.0711309	-0.0266	0.349593	0.285532	FALSE	FALSE	FALSE	ebi-a-GCST90018908	20	19287904	0.0377	469126	0.48	Pulmonary fibrosis || id:ebi-a-GCST90018908	Pulmonary fibrosis	Pulmonary fibrosis || ||	TRUE	igd	20	19307260	0.00629872	7.1121e-30	SERPINE1	1.42233e-29	TRUE	inferred	O6bYcf	2	1	TRUE
rs61751937	C	G	C	G	0.134132	0.0127	0.0275384	0.0239903	FALSE	TRUE	FALSE	ebi-a-GCST90018908	9	113312231	0.0997	469126	0.8989	Pulmonary fibrosis || id:ebi-a-GCST90018908	Pulmonary fibrosis	Pulmonary fibrosis || ||	TRUE	igd	9	110549951	0.0182432	9.73118e-14	SERPINE1	1.94626e-13	TRUE	inferred	O6bYcf	2	1	TRUE
rs61978213	A	G	A	G	0.131774	-0.0133	0.0401553	0.032839	FALSE	FALSE	FALSE	ebi-a-GCST90018908	14	70653758	0.0975	469126	0.8914	Pulmonary fibrosis || id:ebi-a-GCST90018908	Pulmonary fibrosis	Pulmonary fibrosis || ||	TRUE	igd	14	70187041	0.0151784	1.94984e-18	SERPINE1	3.90032e-18	TRUE	inferred	O6bYcf	2	1	TRUE
rs6580981	A	G	A	G	0.0565324	0.0263	0.476149	0.549957	FALSE	FALSE	FALSE	ebi-a-GCST90018908	12	54723028	0.0353	469126	0.4559	Pulmonary fibrosis || id:ebi-a-GCST90018908	Pulmonary fibrosis	Pulmonary fibrosis || ||	TRUE	igd	12	54329244	0.00610895	1.08093e-20	SERPINE1	2.16172e-20	TRUE	inferred	O6bYcf	2	1	TRUE
rs6993770	T	A	T	A	-0.15157	-0.0424	0.291855	0.30005	FALSE	TRUE	FALSE	ebi-a-GCST90018908	8	106581528	0.0391	469126	0.2784	Pulmonary fibrosis || id:ebi-a-GCST90018908	Pulmonary fibrosis	Pulmonary fibrosis || ||	TRUE	igd	8	105569300	0.00659458	3.36727e-117	SERPINE1	6.72977e-117	TRUE	inferred	O6bYcf	2	1	TRUE
rs7618405	A	C	A	C	-0.0640182	-0.0404	0.204005	0.158723	FALSE	FALSE	FALSE	ebi-a-GCST90018908	3	18250509	0.0442	469126	0.3611	Pulmonary fibrosis || id:ebi-a-GCST90018908	Pulmonary fibrosis	Pulmonary fibrosis || ||	TRUE	igd	3	18209017	0.00747556	5.46671e-18	SERPINE1	1.0932e-17	TRUE	inferred	O6bYcf	2	1	TRUE
rs78909033	A	G	A	G	-0.089021	0.1171	0.128784	0.133743	FALSE	FALSE	FALSE	ebi-a-GCST90018908	2	241510903	0.0532	469126	0.0276102	Pulmonary fibrosis || id:ebi-a-GCST90018908	Pulmonary fibrosis	Pulmonary fibrosis || ||	TRUE	igd	2	240571486	0.00897003	1.63241e-23	SERPINE1	3.26513e-23	TRUE	inferred	O6bYcf	2	1	TRUE
rs7896897	A	G	A	G	0.0444943	0.0275	0.330269	0.260443	FALSE	FALSE	FALSE	ebi-a-GCST90018908	10	3140734	0.039	469126	0.4811	Pulmonary fibrosis || id:ebi-a-GCST90018908	Pulmonary fibrosis	Pulmonary fibrosis || ||	TRUE	igd	10	3098542	0.00646686	2.98516e-12	SERPINE1	5.97035e-12	TRUE	inferred	O6bYcf	2	1	TRUE
rs892090	G	T	G	T	0.149138	-0.0591	0.831894	0.883365	FALSE	FALSE	FALSE	ebi-a-GCST90018908	19	55539072	0.0501	469126	0.2387	Pulmonary fibrosis || id:ebi-a-GCST90018908	Pulmonary fibrosis	Pulmonary fibrosis || ||	TRUE	igd	19	55027704	0.00806112	1.01522e-76	SERPINE1	2.03002e-76	TRUE	inferred	O6bYcf	2	1	TRUE
rs9378249	G	T	G	T	-0.0864297	-0.0704	0.0623115	0.0992219	FALSE	FALSE	FALSE	ebi-a-GCST90018908	6	31327701	0.0625	469126	0.2601	Pulmonary fibrosis || id:ebi-a-GCST90018908	Pulmonary fibrosis	Pulmonary fibrosis || ||	TRUE	igd	6	31359924	0.0124086	1.63845e-12	SERPINE1	3.27718e-12	TRUE	inferred	O6bYcf	2	1	TRUE
rs1354034	C	T	C	T	0.0533567	0.0386	0.588576	0.605125	FALSE	FALSE	FALSE	ebi-a-GCST90018908	3	56849749	0.0361	469126	0.2854	Pulmonary fibrosis || id:ebi-a-GCST90018908	Pulmonary fibrosis	Pulmonary fibrosis || ||	TRUE	igd	3	56815721	0.00625658	7.43896e-18	NFKB1	1.48765e-17	TRUE	inferred	WsmYaa	2	1	TRUE
rs230509	A	G	A	G	-0.119493	-0.0501	0.663425	0.655605	FALSE	FALSE	FALSE	ebi-a-GCST90018908	4	103478265	0.0364	469126	0.1689	Pulmonary fibrosis || id:ebi-a-GCST90018908	Pulmonary fibrosis	Pulmonary fibrosis || ||	TRUE	igd	4	102557108	0.00654372	8.50263e-75	NFKB1	1.70177e-74	TRUE	inferred	WsmYaa	2	1	TRUE
rs342293	G	C	G	C	-0.0441637	-0.0094	0.45432	0.38866	FALSE	TRUE	TRUE	ebi-a-GCST90018908	7	106372219	0.0353	469126	0.7906	Pulmonary fibrosis || id:ebi-a-GCST90018908	Pulmonary fibrosis	Pulmonary fibrosis || ||	TRUE	igd	7	106731773	0.00613646	3.07907e-13	NFKB1	6.15886e-13	TRUE	inferred	WsmYaa	2	1	FALSE
rs6580981	A	G	A	G	0.0507117	0.0263	0.476524	0.549957	FALSE	FALSE	FALSE	ebi-a-GCST90018908	12	54723028	0.0353	469126	0.4559	Pulmonary fibrosis || id:ebi-a-GCST90018908	Pulmonary fibrosis	Pulmonary fibrosis || ||	TRUE	igd	12	54329244	0.00626303	2.81675e-16	NFKB1	5.63378e-16	TRUE	inferred	WsmYaa	2	1	TRUE
rs1049728	C	G	C	G	-0.167984	-0.0343	0.0573673	0.0774461	FALSE	TRUE	FALSE	ebi-a-GCST90018908	11	65421117	0.0671	469126	0.6097	Pulmonary fibrosis || id:ebi-a-GCST90018908	Pulmonary fibrosis	Pulmonary fibrosis || ||	TRUE	igd	11	65653646	0.0122915	8.02773e-43	ICAM1	1.6062e-42	TRUE	inferred	SVayis	2	1	TRUE
rs186021206	A	G	A	G	0.599872	-0.0181	0.00602626	0.00596993	FALSE	FALSE	FALSE	ebi-a-GCST90018908	17	7069412	0.2559	469126	0.9437	Pulmonary fibrosis || id:ebi-a-GCST90018908	Pulmonary fibrosis	Pulmonary fibrosis || ||	TRUE	igd	17	7166093	0.03981	1.30733e-51	ICAM1	2.61517e-51	TRUE	inferred	SVayis	2	1	TRUE
rs28894750	T	A	T	A	0.0415139	0.0854	0.525359	0.53505	FALSE	TRUE	TRUE	ebi-a-GCST90018908	19	49213531	0.0438	469126	0.0513204	Pulmonary fibrosis || id:ebi-a-GCST90018908	Pulmonary fibrosis	Pulmonary fibrosis || ||	TRUE	igd	19	48710274	0.00607811	4.24374e-12	ICAM1	8.4879e-12	TRUE	inferred	SVayis	2	1	FALSE
rs3136642	G	A	G	A	-0.0557414	-0.0736	0.371438	0.47157	FALSE	FALSE	FALSE	ebi-a-GCST90018908	19	39398416	0.0362	469126	0.0420204	Pulmonary fibrosis || id:ebi-a-GCST90018908	Pulmonary fibrosis	Pulmonary fibrosis || ||	TRUE	igd	19	38907776	0.00629751	4.32375e-19	ICAM1	8.64769e-19	TRUE	inferred	SVayis	2	1	TRUE
rs3184504	C	T	C	T	-0.0818071	-0.0293	0.539105	0.664711	FALSE	FALSE	FALSE	ebi-a-GCST90018908	12	111884608	0.0364	469126	0.4206	Pulmonary fibrosis || id:ebi-a-GCST90018908	Pulmonary fibrosis	Pulmonary fibrosis || ||	TRUE	igd	12	111446804	0.00572267	1.17102e-46	ICAM1	2.34207e-46	TRUE	inferred	SVayis	2	1	TRUE
rs34434834	A	G	A	G	0.135206	0.1476	0.031123	0.0335734	FALSE	FALSE	FALSE	ebi-a-GCST90018908	11	126307796	0.1215	469126	0.2245	Pulmonary fibrosis || id:ebi-a-GCST90018908	Pulmonary fibrosis	Pulmonary fibrosis || ||	TRUE	igd	11	126437901	0.0162458	4.30562e-17	ICAM1	8.60994e-17	TRUE	inferred	SVayis	2	1	TRUE
rs5030379	CTTGATTGA	C	GAACT	G	0.413316	0.0772	0.369876	0.379782	TRUE	FALSE	FALSE	ebi-a-GCST90018908	19	10393605	0.0375	469126	0.0397201	Pulmonary fibrosis || id:ebi-a-GCST90018908	Pulmonary fibrosis	Pulmonary fibrosis || ||	TRUE	igd	19	10282929	0.00627133	0	ICAM1	0	TRUE	inferred	SVayis	2	1	FALSE
rs5030379	CTTGATTGA	C	CTTGATTGA	C	0.413316	0.0453	0.369876	0.375709	FALSE	FALSE	FALSE	ebi-a-GCST90018908	19	10393605	0.0452	469126	0.3165	Pulmonary fibrosis || id:ebi-a-GCST90018908	Pulmonary fibrosis	Pulmonary fibrosis || ||	TRUE	igd	19	10282929	0.00627133	0	ICAM1	0	TRUE	inferred	SVayis	2	2	TRUE
rs10820606	C	A	C	A	0.0757772	-0.0661	0.230343	0.228584	FALSE	FALSE	FALSE	ebi-a-GCST90018908	9	99192919	0.0527	469126	0.2094	Pulmonary fibrosis || id:ebi-a-GCST90018908	Pulmonary fibrosis	Pulmonary fibrosis || ||	TRUE	igd	9	96430637	0.00660848	9.70006e-31	MMP1	1.93999e-30	TRUE	inferred	yjkEyB	2	1	TRUE
rs10883368	G	A	G	A	0.0653425	0.0438	0.271888	0.344703	FALSE	FALSE	FALSE	ebi-a-GCST90018908	10	101289998	0.0377	469126	0.2444	Pulmonary fibrosis || id:ebi-a-GCST90018908	Pulmonary fibrosis	Pulmonary fibrosis || ||	TRUE	igd	10	99530241	0.00618895	2.33422e-26	MMP1	4.66767e-26	TRUE	inferred	yjkEyB	2	1	TRUE
rs11056780	C	T	C	T	0.0442297	0.0152	0.576506	0.687335	FALSE	FALSE	FALSE	ebi-a-GCST90018908	12	8141523	0.0433	469126	0.7262	Pulmonary fibrosis || id:ebi-a-GCST90018908	Pulmonary fibrosis	Pulmonary fibrosis || ||	TRUE	igd	12	7988927	0.00556037	8.99626e-16	MMP1	1.79929e-15	TRUE	inferred	yjkEyB	2	1	TRUE
rs1130580	C	T	C	T	-0.0474311	-0.0116	0.295822	0.404585	FALSE	FALSE	FALSE	ebi-a-GCST90018908	6	31236679	0.0466	469126	0.8041	Pulmonary fibrosis || id:ebi-a-GCST90018908	Pulmonary fibrosis	Pulmonary fibrosis || ||	TRUE	igd	6	31268902	0.00628553	2.24281e-14	MMP1	4.48539e-14	TRUE	inferred	yjkEyB	2	1	TRUE
rs11451125	AT	A	AT	A	0.0446973	0.0163	0.748565	0.738893	FALSE	FALSE	FALSE	ebi-a-GCST90018908	1	111232886	0.041	469126	0.6912	Pulmonary fibrosis || id:ebi-a-GCST90018908	Pulmonary fibrosis	Pulmonary fibrosis || ||	TRUE	igd	1	110690264	0.00633966	8.91858e-13	MMP1	1.78361e-12	TRUE	inferred	yjkEyB	2	1	TRUE
rs11627588	T	G	T	G	0.0466201	0.0275	0.798943	0.810871	FALSE	FALSE	FALSE	ebi-a-GCST90018908	14	89820567	0.0559	469126	0.6229	Pulmonary fibrosis || id:ebi-a-GCST90018908	Pulmonary fibrosis	Pulmonary fibrosis || ||	TRUE	igd	14	89354223	0.00690144	7.13554e-12	MMP1	1.42725e-11	TRUE	inferred	yjkEyB	2	1	TRUE
rs12136856	G	C	G	C	0.0888986	-0.0052	0.643715	0.655555	FALSE	TRUE	FALSE	ebi-a-GCST90018908	1	156473114	0.0362	469126	0.8863	Pulmonary fibrosis || id:ebi-a-GCST90018908	Pulmonary fibrosis	Pulmonary fibrosis || ||	TRUE	igd	1	156503322	0.00579308	1.89362e-53	MMP1	3.78704e-53	TRUE	inferred	yjkEyB	2	1	TRUE
rs12445050	T	C	T	C	0.0722634	-0.0142	0.133923	0.127818	FALSE	FALSE	FALSE	ebi-a-GCST90018908	16	81870969	0.0514	469126	0.7819	Pulmonary fibrosis || id:ebi-a-GCST90018908	Pulmonary fibrosis	Pulmonary fibrosis || ||	TRUE	igd	16	81837364	0.00805987	1.53981e-19	MMP1	3.07964e-19	TRUE	inferred	yjkEyB	2	1	TRUE
rs12468278	G	A	G	A	-0.0568448	0.0582	0.270082	0.373603	FALSE	FALSE	FALSE	ebi-a-GCST90018908	2	68645870	0.0393	469126	0.1385	Pulmonary fibrosis || id:ebi-a-GCST90018908	Pulmonary fibrosis	Pulmonary fibrosis || ||	TRUE	igd	2	68418738	0.00624678	4.52257e-20	MMP1	9.04482e-20	TRUE	inferred	yjkEyB	2	1	TRUE
rs1343214	C	G	C	G	0.0369157	0.0233	0.350619	0.386354	FALSE	TRUE	FALSE	ebi-a-GCST90018908	X	99957238	0.0294	469126	0.4283	Pulmonary fibrosis || id:ebi-a-GCST90018908	Pulmonary fibrosis	Pulmonary fibrosis || ||	TRUE	igd	23	100702242	0.00472379	2.75147e-15	MMP1	5.50301e-15	TRUE	inferred	yjkEyB	2	1	TRUE
rs1344674	G	A	G	A	-0.0409181	0.0755	0.452591	0.424408	FALSE	FALSE	FALSE	ebi-a-GCST90018908	3	141125186	0.035	469126	0.03111	Pulmonary fibrosis || id:ebi-a-GCST90018908	Pulmonary fibrosis	Pulmonary fibrosis || ||	TRUE	igd	3	141406344	0.00556478	9.68679e-14	MMP1	1.93731e-13	TRUE	inferred	yjkEyB	2	1	TRUE
rs150813342	T	C	T	C	-0.239471	-0.0958	0.00750023	0.00760222	FALSE	FALSE	FALSE	ebi-a-GCST90018908	9	135864513	0.2178	469126	0.6599	Pulmonary fibrosis || id:ebi-a-GCST90018908	Pulmonary fibrosis	Pulmonary fibrosis || ||	TRUE	igd	9	132989126	0.0328594	1.5759e-13	MMP1	3.1521e-13	TRUE	inferred	yjkEyB	2	1	TRUE
rs188708679	G	T	G	T	-0.377921	0.2014	0.00323698	0.0106752	FALSE	FALSE	FALSE	ebi-a-GCST90018908	4	10434414	0.1715	469126	0.2403	Pulmonary fibrosis || id:ebi-a-GCST90018908	Pulmonary fibrosis	Pulmonary fibrosis || ||	TRUE	igd	4	10432790	0.0502482	2.71617e-14	MMP1	5.43125e-14	TRUE	inferred	yjkEyB	2	1	TRUE
rs201250916	TG	T	TG	T	0.0815909	-0.0552	0.0631061	0.0503042	FALSE	FALSE	FALSE	ebi-a-GCST90018908	5	176588691	0.0998	469126	0.5802	Pulmonary fibrosis || id:ebi-a-GCST90018908	Pulmonary fibrosis	Pulmonary fibrosis || ||	TRUE	igd	5	177161690	0.0118375	2.7395e-12	MMP1	5.47898e-12	TRUE	inferred	yjkEyB	2	1	TRUE
rs2546980	C	T	C	T	-0.0549458	-0.0149	0.702475	0.707627	FALSE	FALSE	FALSE	ebi-a-GCST90018908	5	159595476	0.0481	469126	0.757	Pulmonary fibrosis || id:ebi-a-GCST90018908	Pulmonary fibrosis	Pulmonary fibrosis || ||	TRUE	igd	5	160168469	0.00602573	3.80751e-20	MMP1	7.61553e-20	TRUE	inferred	yjkEyB	2	1	TRUE
rs274555	T	C	T	C	0.0447527	0.0244	0.406605	0.431582	FALSE	FALSE	FALSE	ebi-a-GCST90018908	5	131722951	0.0368	469126	0.506499	Pulmonary fibrosis || id:ebi-a-GCST90018908	Pulmonary fibrosis	Pulmonary fibrosis || ||	TRUE	igd	5	132387259	0.00564659	1.1351e-15	MMP1	2.27039e-15	TRUE	inferred	yjkEyB	2	1	TRUE
rs3002417	C	T	C	T	-0.0343331	-0.052	0.422079	0.484716	FALSE	FALSE	FALSE	ebi-a-GCST90018908	X	39708724	0.0288	469126	0.0706301	Pulmonary fibrosis || id:ebi-a-GCST90018908	Pulmonary fibrosis	Pulmonary fibrosis || ||	TRUE	igd	23	39849470	0.00480044	4.27384e-13	MMP1	8.5487e-13	TRUE	inferred	yjkEyB	2	1	TRUE
rs3184504	C	T	C	T	-0.0402159	-0.0293	0.539328	0.664711	FALSE	FALSE	FALSE	ebi-a-GCST90018908	12	111884608	0.0364	469126	0.4206	Pulmonary fibrosis || id:ebi-a-GCST90018908	Pulmonary fibrosis	Pulmonary fibrosis || ||	TRUE	igd	12	111446804	0.00558805	3.08282e-13	MMP1	6.16595e-13	TRUE	inferred	yjkEyB	2	1	TRUE
rs3811444	T	C	T	C	-0.0421633	0.0461	0.324831	0.295373	FALSE	FALSE	FALSE	ebi-a-GCST90018908	1	248039451	0.0372	469126	0.2148	Pulmonary fibrosis || id:ebi-a-GCST90018908	Pulmonary fibrosis	Pulmonary fibrosis || ||	TRUE	igd	1	247876149	0.00587813	3.67099e-13	MMP1	7.34176e-13	TRUE	inferred	yjkEyB	2	1	TRUE
rs471994	A	G	A	G	-0.456829	0.028	0.369395	0.414559	FALSE	FALSE	FALSE	ebi-a-GCST90018908	11	102697731	0.0363	469126	0.4403	Pulmonary fibrosis || id:ebi-a-GCST90018908	Pulmonary fibrosis	Pulmonary fibrosis || ||	TRUE	igd	11	102827000	0.00643224	0	MMP1	0	TRUE	inferred	yjkEyB	2	1	TRUE
rs4966015	T	G	T	G	-0.0572434	0.0164	0.148828	0.179396	FALSE	FALSE	FALSE	ebi-a-GCST90018908	15	99248132	0.0468	469126	0.7257	Pulmonary fibrosis || id:ebi-a-GCST90018908	Pulmonary fibrosis	Pulmonary fibrosis || ||	TRUE	igd	15	98704903	0.00767929	4.51879e-14	MMP1	9.03858e-14	TRUE	inferred	yjkEyB	2	1	TRUE
rs559972	T	C	T	C	0.037954	-0.0217	0.471636	0.353516	FALSE	FALSE	FALSE	ebi-a-GCST90018908	17	27814496	0.036	469126	0.5461	Pulmonary fibrosis || id:ebi-a-GCST90018908	Pulmonary fibrosis	Pulmonary fibrosis || ||	TRUE	igd	17	29487478	0.00552003	3.08459e-12	MMP1	6.16879e-12	TRUE	inferred	yjkEyB	2	1	TRUE
rs5879021	GC	G	GC	G	0.0733358	0.0348	0.529965	0.523408	FALSE	FALSE	FALSE	ebi-a-GCST90018908	6	109635558	0.0353	469126	0.3238	Pulmonary fibrosis || id:ebi-a-GCST90018908	Pulmonary fibrosis	Pulmonary fibrosis || ||	TRUE	igd	6	109314355	0.00558167	9.88166e-40	MMP1	1.97606e-39	TRUE	inferred	yjkEyB	2	1	TRUE
rs5980948	T	C	T	C	0.0602082	-0.0066	0.194077	0.220639	FALSE	FALSE	FALSE	ebi-a-GCST90018908	X	69701403	0.0341	469126	0.847	Pulmonary fibrosis || id:ebi-a-GCST90018908	Pulmonary fibrosis	Pulmonary fibrosis || ||	TRUE	igd	23	70481553	0.00573598	4.4781e-26	MMP1	8.95571e-26	TRUE	inferred	yjkEyB	2	1	TRUE
rs6081565	A	G	A	G	0.0590995	-0.0266	0.350096	0.285532	FALSE	FALSE	FALSE	ebi-a-GCST90018908	20	19287904	0.0377	469126	0.48	Pulmonary fibrosis || id:ebi-a-GCST90018908	Pulmonary fibrosis	Pulmonary fibrosis || ||	TRUE	igd	20	19307260	0.00576431	5.75665e-25	MMP1	1.15133e-24	TRUE	inferred	yjkEyB	2	1	TRUE
rs6993770	T	A	T	A	-0.151703	-0.0424	0.291921	0.30005	FALSE	TRUE	FALSE	ebi-a-GCST90018908	8	106581528	0.0391	469126	0.2784	Pulmonary fibrosis || id:ebi-a-GCST90018908	Pulmonary fibrosis	Pulmonary fibrosis || ||	TRUE	igd	8	105569300	0.00603601	1.08432e-139	MMP1	2.1677e-139	TRUE	inferred	yjkEyB	2	1	TRUE
rs76036957	A	G	A	G	0.337322	0.307	0.00902086	0.00805021	FALSE	FALSE	FALSE	ebi-a-GCST90018908	2	113496453	0.2074	469126	0.1388	Pulmonary fibrosis || id:ebi-a-GCST90018908	Pulmonary fibrosis	Pulmonary fibrosis || ||	TRUE	igd	2	112738876	0.0291919	3.46908e-31	MMP1	6.93585e-31	TRUE	inferred	yjkEyB	2	1	TRUE
rs7618405	A	C	A	C	-0.0464711	-0.0404	0.204313	0.158723	FALSE	FALSE	FALSE	ebi-a-GCST90018908	3	18250509	0.0442	469126	0.3611	Pulmonary fibrosis || id:ebi-a-GCST90018908	Pulmonary fibrosis	Pulmonary fibrosis || ||	TRUE	igd	3	18209017	0.00682412	4.88569e-12	MMP1	9.77237e-12	TRUE	inferred	yjkEyB	2	1	TRUE
rs79977579	A	C	A	C	0.0934783	0.0923	0.0944033	0.0980786	FALSE	FALSE	FALSE	ebi-a-GCST90018908	12	54694560	0.0611	469126	0.1312	Pulmonary fibrosis || id:ebi-a-GCST90018908	Pulmonary fibrosis	Pulmonary fibrosis || ||	TRUE	igd	12	54300776	0.00947301	2.86889e-23	MMP1	5.73852e-23	TRUE	inferred	yjkEyB	2	1	TRUE
rs8026714	A	G	A	G	-0.0583976	0.0777	0.136233	0.228055	FALSE	FALSE	FALSE	ebi-a-GCST90018908	15	91522253	0.0485	469126	0.1088	Pulmonary fibrosis || id:ebi-a-GCST90018908	Pulmonary fibrosis	Pulmonary fibrosis || ||	TRUE	igd	15	90979023	0.00802045	1.6557e-13	MMP1	3.31131e-13	TRUE	inferred	yjkEyB	2	1	TRUE
rs892090	G	T	G	T	0.105211	-0.0591	0.831912	0.883365	FALSE	FALSE	FALSE	ebi-a-GCST90018908	19	55539072	0.0501	469126	0.2387	Pulmonary fibrosis || id:ebi-a-GCST90018908	Pulmonary fibrosis	Pulmonary fibrosis || ||	TRUE	igd	19	55027704	0.00737213	1.64821e-46	MMP1	3.29686e-46	TRUE	inferred	yjkEyB	2	1	TRUE
rs9985030	A	G	A	G	-0.0673569	-0.0676	0.0841956	0.0787685	FALSE	FALSE	FALSE	ebi-a-GCST90018908	21	36429268	0.0679	469126	0.3193	Pulmonary fibrosis || id:ebi-a-GCST90018908	Pulmonary fibrosis	Pulmonary fibrosis || ||	TRUE	igd	21	35056971	0.00994793	6.39714e-12	MMP1	1.27938e-11	TRUE	inferred	yjkEyB	2	1	TRUE
rs1070073	G	T	G	T	0.128552	-0.0207	0.681159	0.722187	FALSE	FALSE	FALSE	ebi-a-GCST90018908	12	104000319	0.0377	469126	0.5835	Pulmonary fibrosis || id:ebi-a-GCST90018908	Pulmonary fibrosis	Pulmonary fibrosis || ||	TRUE	igd	12	103606541	0.00635417	2.60509e-91	PDGFRA	5.20955e-91	TRUE	inferred	61BtBW	2	1	TRUE
rs11260029	C	T	C	T	-0.0465225	0.0206	0.274896	0.250759	FALSE	FALSE	FALSE	ebi-a-GCST90018908	19	7827576	0.0392	469126	0.5993	Pulmonary fibrosis || id:ebi-a-GCST90018908	Pulmonary fibrosis	Pulmonary fibrosis || ||	TRUE	igd	19	7762690	0.00660463	9.34513e-13	PDGFRA	1.86896e-12	TRUE	inferred	61BtBW	2	1	TRUE
rs12592898	G	A	G	A	-0.0662065	-0.0661	0.868327	0.887551	FALSE	FALSE	FALSE	ebi-a-GCST90018908	15	79229199	0.0523	469126	0.2066	Pulmonary fibrosis || id:ebi-a-GCST90018908	Pulmonary fibrosis	Pulmonary fibrosis || ||	TRUE	igd	15	78936857	0.00869325	1.30979e-14	PDGFRA	2.61939e-14	TRUE	inferred	61BtBW	2	1	TRUE
rs186021206	A	G	A	G	0.348644	-0.0181	0.00603624	0.00596993	FALSE	FALSE	FALSE	ebi-a-GCST90018908	17	7069412	0.2559	469126	0.9437	Pulmonary fibrosis || id:ebi-a-GCST90018908	Pulmonary fibrosis	Pulmonary fibrosis || ||	TRUE	igd	17	7166093	0.0414211	1.9302e-17	PDGFRA	3.86011e-17	TRUE	inferred	61BtBW	2	1	TRUE
rs34659852	A	T	A	T	0.0572277	-0.0909	0.201395	0.192129	FALSE	TRUE	FALSE	ebi-a-GCST90018908	2	62616186	0.0554	469126	0.1011	Pulmonary fibrosis || id:ebi-a-GCST90018908	Pulmonary fibrosis	Pulmonary fibrosis || ||	TRUE	igd	2	62389051	0.00734607	3.34392e-15	PDGFRA	6.68806e-15	TRUE	inferred	61BtBW	2	1	TRUE
rs35597368	C	T	C	T	-0.425154	0.0838	0.114406	0.120056	FALSE	FALSE	FALSE	ebi-a-GCST90018908	4	55139771	0.0546	469126	0.1251	Pulmonary fibrosis || id:ebi-a-GCST90018908	Pulmonary fibrosis	Pulmonary fibrosis || ||	TRUE	igd	4	54273604	0.00936027	0	PDGFRA	0	TRUE	inferred	61BtBW	2	1	TRUE
rs36024818	ATCTT	A	ATCTT	A	0.0841136	0.0837	0.363262	0.339814	FALSE	FALSE	FALSE	ebi-a-GCST90018908	3	58399338	0.0386	469126	0.03004	Pulmonary fibrosis || id:ebi-a-GCST90018908	Pulmonary fibrosis	Pulmonary fibrosis || ||	TRUE	igd	3	58413611	0.00613311	4.14696e-43	PDGFRA	8.29469e-43	TRUE	inferred	61BtBW	2	1	TRUE
rs3762654	G	A	G	A	-0.0444105	-0.0785	0.660018	0.703253	FALSE	FALSE	FALSE	ebi-a-GCST90018908	3	98305560	0.0373	469126	0.0353199	Pulmonary fibrosis || id:ebi-a-GCST90018908	Pulmonary fibrosis	Pulmonary fibrosis || ||	TRUE	igd	3	98586716	0.00616271	2.87408e-13	PDGFRA	5.7491e-13	TRUE	inferred	61BtBW	2	1	TRUE
rs6913664	T	C	T	C	0.0566476	-0.0035	0.483115	0.54343	FALSE	FALSE	FALSE	ebi-a-GCST90018908	6	32295874	0.0351	469126	0.9203	Pulmonary fibrosis || id:ebi-a-GCST90018908	Pulmonary fibrosis	Pulmonary fibrosis || ||	TRUE	igd	6	32328097	0.00586838	2.38641e-22	PDGFRA	4.77309e-22	TRUE	inferred	61BtBW	2	1	TRUE
rs738408	T	C	T	C	0.0543939	0.0446	0.214642	0.28405	FALSE	FALSE	FALSE	ebi-a-GCST90018908	22	44324730	0.0413	469126	0.28	Pulmonary fibrosis || id:ebi-a-GCST90018908	Pulmonary fibrosis	Pulmonary fibrosis || ||	TRUE	igd	22	43928850	0.00707763	7.63034e-15	PDGFRA	1.52616e-14	TRUE	inferred	61BtBW	2	1	TRUE
rs8134160	T	A	T	A	0.0446932	-0.0205	0.274852	0.304043	FALSE	TRUE	FALSE	ebi-a-GCST90018908	21	42541202	0.0396	469126	0.6039	Pulmonary fibrosis || id:ebi-a-GCST90018908	Pulmonary fibrosis	Pulmonary fibrosis || ||	TRUE	igd	21	41169275	0.00661889	7.27243e-12	PDGFRA	1.45445e-11	TRUE	inferred	61BtBW	2	1	TRUE
rs887048	C	T	C	T	0.0427824	0.023	0.603842	0.556435	FALSE	FALSE	FALSE	ebi-a-GCST90018908	7	76060235	0.0352	469126	0.513	Pulmonary fibrosis || id:ebi-a-GCST90018908	Pulmonary fibrosis	Pulmonary fibrosis || ||	TRUE	igd	7	76430918	0.00594864	3.19331e-13	PDGFRA	6.38705e-13	TRUE	inferred	61BtBW	2	1	TRUE
rs1800783	T	A	T	A	0.0479463	0.0021	0.619559	0.700099	FALSE	TRUE	FALSE	ebi-a-GCST90018908	7	150689397	0.037	469126	0.9548	Pulmonary fibrosis || id:ebi-a-GCST90018908	Pulmonary fibrosis	Pulmonary fibrosis || ||	TRUE	igd	7	150992309	0.00630496	1.42963e-14	NOS3	2.85957e-14	TRUE	inferred	KN2VmP	2	1	TRUE
rs1864163	A	G	A	G	0.0472306	0.0068	0.261517	0.20684	FALSE	FALSE	FALSE	ebi-a-GCST90018908	16	56997233	0.0413	469126	0.8702	Pulmonary fibrosis || id:ebi-a-GCST90018908	Pulmonary fibrosis	Pulmonary fibrosis || ||	TRUE	igd	16	56963321	0.00691844	4.34238e-12	NOS3	8.6836e-12	TRUE	inferred	KN2VmP	2	1	TRUE
rs189448562	C	G	C	G	0.249266	-0.25	0.0107564	0.0107806	FALSE	TRUE	FALSE	ebi-a-GCST90018908	20	3705115	0.2166	469126	0.2485	Pulmonary fibrosis || id:ebi-a-GCST90018908	Pulmonary fibrosis	Pulmonary fibrosis || ||	TRUE	igd	20	3724468	0.0298967	3.79145e-17	NOS3	7.58403e-17	TRUE	inferred	KN2VmP	2	1	TRUE
rs2412973	A	C	A	C	-0.0421463	0.0589	0.454041	0.442917	FALSE	FALSE	FALSE	ebi-a-GCST90018908	22	30529631	0.0438	469126	0.1791	Pulmonary fibrosis || id:ebi-a-GCST90018908	Pulmonary fibrosis	Pulmonary fibrosis || ||	TRUE	igd	22	30133642	0.00613517	3.21861e-12	NOS3	6.43724e-12	TRUE	inferred	KN2VmP	2	1	TRUE
rs3184504	C	T	C	T	-0.050065	-0.0293	0.538925	0.664711	FALSE	FALSE	FALSE	ebi-a-GCST90018908	12	111884608	0.0364	469126	0.4206	Pulmonary fibrosis || id:ebi-a-GCST90018908	Pulmonary fibrosis	Pulmonary fibrosis || ||	TRUE	igd	12	111446804	0.00619519	3.2048e-16	NOS3	6.40914e-16	TRUE	inferred	KN2VmP	2	1	TRUE
rs529565	C	T	C	T	0.0628957	0.0172	0.324524	0.375918	FALSE	FALSE	FALSE	ebi-a-GCST90018908	9	136149500	0.0365	469126	0.638	Pulmonary fibrosis || id:ebi-a-GCST90018908	Pulmonary fibrosis	Pulmonary fibrosis || ||	TRUE	igd	9	133274084	0.00648573	1.5441e-22	NOS3	3.08816e-22	TRUE	inferred	KN2VmP	2	1	TRUE
rs6415128	A	G	A	G	0.0509559	0.0034	0.565096	0.656039	FALSE	FALSE	FALSE	ebi-a-GCST90018908	6	32330894	0.0384	469126	0.93	Pulmonary fibrosis || id:ebi-a-GCST90018908	Pulmonary fibrosis	Pulmonary fibrosis || ||	TRUE	igd	6	32363117	0.00614556	5.59154e-17	NOS3	1.11841e-16	TRUE	inferred	KN2VmP	2	1	TRUE
rs7572209	C	T	C	T	-0.079465	0.0963	0.19674	0.224091	FALSE	FALSE	FALSE	ebi-a-GCST90018908	2	86090072	0.0421	469126	0.0222101	Pulmonary fibrosis || id:ebi-a-GCST90018908	Pulmonary fibrosis	Pulmonary fibrosis || ||	TRUE	igd	2	85862949	0.00767173	1.92143e-25	NOS3	3.84238e-25	TRUE	inferred	KN2VmP	2	1	TRUE
rs4986791	T	C	T	C	-0.330605	0.0551	0.0614398	0.0734894	FALSE	FALSE	FALSE	ebi-a-GCST90018908	9	120475602	0.0681	469126	0.4181	Pulmonary fibrosis || id:ebi-a-GCST90018908	Pulmonary fibrosis	Pulmonary fibrosis || ||	TRUE	igd	9	117713324	0.0131308	3.50424e-140	TLR4	7.01455e-140	TRUE	inferred	cQEHpx	2	1	TRUE
rs635634	T	C	T	C	-0.0886011	0.0643	0.182019	0.212425	FALSE	FALSE	FALSE	ebi-a-GCST90018908	9	136155000	0.0441	469126	0.1449	Pulmonary fibrosis || id:ebi-a-GCST90018908	Pulmonary fibrosis	Pulmonary fibrosis || ||	TRUE	igd	9	133279427	0.00819781	1.57911e-27	TLR4	3.15791e-27	TRUE	inferred	cQEHpx	2	1	TRUE
rs10883368	G	A	G	A	0.0653425	-0.012	0.271888	0.3826	FALSE	FALSE	FALSE	finn-b-IPF	10	101289998	0.0467	NA	0.7966	Idiopathic pulmonary fibrosis || id:finn-b-IPF	Idiopathic pulmonary fibrosis	Idiopathic pulmonary fibrosis || ||	TRUE	igd	10	99530241	0.00618895	2.33422e-26	MMP1	4.66767e-26	TRUE	inferred	yjkEyB	2	1	TRUE
rs11451125	AT	A	AT	A	0.0446973	-0.0361	0.748565	0.7251	FALSE	FALSE	FALSE	finn-b-IPF	1	111232886	0.051	NA	0.4793	Idiopathic pulmonary fibrosis || id:finn-b-IPF	Idiopathic pulmonary fibrosis	Idiopathic pulmonary fibrosis || ||	TRUE	igd	1	110690264	0.00633966	8.91858e-13	MMP1	1.78361e-12	TRUE	inferred	yjkEyB	2	1	TRUE
rs12136856	G	C	G	C	0.0888986	-0.0895	0.643715	0.5791	FALSE	TRUE	TRUE	finn-b-IPF	1	156473114	0.0459	NA	0.0512602	Idiopathic pulmonary fibrosis || id:finn-b-IPF	Idiopathic pulmonary fibrosis	Idiopathic pulmonary fibrosis || ||	TRUE	igd	1	156503322	0.00579308	1.89362e-53	MMP1	3.78704e-53	TRUE	inferred	yjkEyB	2	1	FALSE
rs12445050	T	C	T	C	0.0722634	-0.0096	0.133923	0.1294	FALSE	FALSE	FALSE	finn-b-IPF	16	81870969	0.0676	NA	0.8876	Idiopathic pulmonary fibrosis || id:finn-b-IPF	Idiopathic pulmonary fibrosis	Idiopathic pulmonary fibrosis || ||	TRUE	igd	16	81837364	0.00805987	1.53981e-19	MMP1	3.07964e-19	TRUE	inferred	yjkEyB	2	1	TRUE
rs12468278	G	A	G	A	-0.0568448	0.0523	0.270082	0.278	FALSE	FALSE	FALSE	finn-b-IPF	2	68645870	0.0511	NA	0.3059	Idiopathic pulmonary fibrosis || id:finn-b-IPF	Idiopathic pulmonary fibrosis	Idiopathic pulmonary fibrosis || ||	TRUE	igd	2	68418738	0.00624678	4.52257e-20	MMP1	9.04482e-20	TRUE	inferred	yjkEyB	2	1	TRUE
rs1343214	C	G	C	G	0.0369157	0.025	0.350619	0.2589	FALSE	TRUE	FALSE	finn-b-IPF	X	99957238	0.0412	NA	0.5433	Idiopathic pulmonary fibrosis || id:finn-b-IPF	Idiopathic pulmonary fibrosis	Idiopathic pulmonary fibrosis || ||	TRUE	igd	23	100702242	0.00472379	2.75147e-15	MMP1	5.50301e-15	TRUE	inferred	yjkEyB	2	1	TRUE
rs1344674	G	A	G	A	-0.0409181	0.0757	0.452591	0.4557	FALSE	FALSE	FALSE	finn-b-IPF	3	141125186	0.0457	NA	0.0977305	Idiopathic pulmonary fibrosis || id:finn-b-IPF	Idiopathic pulmonary fibrosis	Idiopathic pulmonary fibrosis || ||	TRUE	igd	3	141406344	0.00556478	9.68679e-14	MMP1	1.93731e-13	TRUE	inferred	yjkEyB	2	1	TRUE
rs150813342	T	C	T	C	-0.239471	-0.2749	0.00750023	0.006521	FALSE	FALSE	FALSE	finn-b-IPF	9	135864513	0.3009	NA	0.3608	Idiopathic pulmonary fibrosis || id:finn-b-IPF	Idiopathic pulmonary fibrosis	Idiopathic pulmonary fibrosis || ||	TRUE	igd	9	132989126	0.0328594	1.5759e-13	MMP1	3.1521e-13	TRUE	inferred	yjkEyB	2	1	TRUE
rs188708679	G	T	G	T	-0.377921	-0.0788	0.00323698	0.03162	FALSE	FALSE	FALSE	finn-b-IPF	4	10434414	0.1323	NA	0.5516	Idiopathic pulmonary fibrosis || id:finn-b-IPF	Idiopathic pulmonary fibrosis	Idiopathic pulmonary fibrosis || ||	TRUE	igd	4	10432790	0.0502482	2.71617e-14	MMP1	5.43125e-14	TRUE	inferred	yjkEyB	2	1	TRUE
rs274555	T	C	T	C	0.0447527	-0.0432	0.406605	0.5162	FALSE	FALSE	FALSE	finn-b-IPF	5	131722951	0.0455	NA	0.3424	Idiopathic pulmonary fibrosis || id:finn-b-IPF	Idiopathic pulmonary fibrosis	Idiopathic pulmonary fibrosis || ||	TRUE	igd	5	132387259	0.00564659	1.1351e-15	MMP1	2.27039e-15	TRUE	inferred	yjkEyB	2	1	TRUE
rs3002417	C	T	C	T	-0.0343331	-0.019	0.422079	0.3948	FALSE	FALSE	FALSE	finn-b-IPF	X	39708724	0.037	NA	0.6077	Idiopathic pulmonary fibrosis || id:finn-b-IPF	Idiopathic pulmonary fibrosis	Idiopathic pulmonary fibrosis || ||	TRUE	igd	23	39849470	0.00480044	4.27384e-13	MMP1	8.5487e-13	TRUE	inferred	yjkEyB	2	1	TRUE
rs3184504	C	T	C	T	-0.0402159	-0.0885	0.539328	0.593	FALSE	FALSE	FALSE	finn-b-IPF	12	111884608	0.0464	NA	0.0564196	Idiopathic pulmonary fibrosis || id:finn-b-IPF	Idiopathic pulmonary fibrosis	Idiopathic pulmonary fibrosis || ||	TRUE	igd	12	111446804	0.00558805	3.08282e-13	MMP1	6.16595e-13	TRUE	inferred	yjkEyB	2	1	TRUE
rs3811444	T	C	T	C	-0.0421633	0.0614	0.324831	0.3457	FALSE	FALSE	FALSE	finn-b-IPF	1	248039451	0.048	NA	0.2006	Idiopathic pulmonary fibrosis || id:finn-b-IPF	Idiopathic pulmonary fibrosis	Idiopathic pulmonary fibrosis || ||	TRUE	igd	1	247876149	0.00587813	3.67099e-13	MMP1	7.34176e-13	TRUE	inferred	yjkEyB	2	1	TRUE
rs471994	A	G	A	G	-0.456829	0.027	0.369395	0.3427	FALSE	FALSE	FALSE	finn-b-IPF	11	102697731	0.0481	NA	0.574	Idiopathic pulmonary fibrosis || id:finn-b-IPF	Idiopathic pulmonary fibrosis	Idiopathic pulmonary fibrosis || ||	TRUE	igd	11	102827000	0.00643224	0	MMP1	0	TRUE	inferred	yjkEyB	2	1	TRUE
rs4966015	T	G	T	G	-0.0572434	0.0015	0.148828	0.1915	FALSE	FALSE	FALSE	finn-b-IPF	15	99248132	0.0579	NA	0.9795	Idiopathic pulmonary fibrosis || id:finn-b-IPF	Idiopathic pulmonary fibrosis	Idiopathic pulmonary fibrosis || ||	TRUE	igd	15	98704903	0.00767929	4.51879e-14	MMP1	9.03858e-14	TRUE	inferred	yjkEyB	2	1	TRUE
rs559972	T	C	T	C	0.037954	0.0064	0.471636	0.461	FALSE	FALSE	FALSE	finn-b-IPF	17	27814496	0.0455	NA	0.8873	Idiopathic pulmonary fibrosis || id:finn-b-IPF	Idiopathic pulmonary fibrosis	Idiopathic pulmonary fibrosis || ||	TRUE	igd	17	29487478	0.00552003	3.08459e-12	MMP1	6.16879e-12	TRUE	inferred	yjkEyB	2	1	TRUE
rs5879021	GC	G	GC	G	0.0733358	0.0371	0.529965	0.6206	FALSE	FALSE	FALSE	finn-b-IPF	6	109635558	0.0475	NA	0.4353	Idiopathic pulmonary fibrosis || id:finn-b-IPF	Idiopathic pulmonary fibrosis	Idiopathic pulmonary fibrosis || ||	TRUE	igd	6	109314355	0.00558167	9.88166e-40	MMP1	1.97606e-39	TRUE	inferred	yjkEyB	2	1	TRUE
rs5980948	T	C	T	C	0.0602082	-0.0114	0.194077	0.2875	FALSE	FALSE	FALSE	finn-b-IPF	X	69701403	0.0395	NA	0.772601	Idiopathic pulmonary fibrosis || id:finn-b-IPF	Idiopathic pulmonary fibrosis	Idiopathic pulmonary fibrosis || ||	TRUE	igd	23	70481553	0.00573598	4.4781e-26	MMP1	8.95571e-26	TRUE	inferred	yjkEyB	2	1	TRUE
rs6081565	A	G	A	G	0.0590995	-0.0299	0.350096	0.2807	FALSE	FALSE	FALSE	finn-b-IPF	20	19287904	0.051	NA	0.5583	Idiopathic pulmonary fibrosis || id:finn-b-IPF	Idiopathic pulmonary fibrosis	Idiopathic pulmonary fibrosis || ||	TRUE	igd	20	19307260	0.00576431	5.75665e-25	MMP1	1.15133e-24	TRUE	inferred	yjkEyB	2	1	TRUE
rs6993770	T	A	T	A	-0.151703	0.0186	0.291921	0.2229	FALSE	TRUE	FALSE	finn-b-IPF	8	106581528	0.0552	NA	0.736801	Idiopathic pulmonary fibrosis || id:finn-b-IPF	Idiopathic pulmonary fibrosis	Idiopathic pulmonary fibrosis || ||	TRUE	igd	8	105569300	0.00603601	1.08432e-139	MMP1	2.1677e-139	TRUE	inferred	yjkEyB	2	1	TRUE
rs76036957	A	G	A	G	0.337322	0.2257	0.00902086	0.005926	FALSE	FALSE	FALSE	finn-b-IPF	2	113496453	0.3154	NA	0.4742	Idiopathic pulmonary fibrosis || id:finn-b-IPF	Idiopathic pulmonary fibrosis	Idiopathic pulmonary fibrosis || ||	TRUE	igd	2	112738876	0.0291919	3.46908e-31	MMP1	6.93585e-31	TRUE	inferred	yjkEyB	2	1	TRUE
rs7618405	A	C	A	C	-0.0464711	0.0004	0.204313	0.2101	FALSE	FALSE	FALSE	finn-b-IPF	3	18250509	0.0559	NA	0.994	Idiopathic pulmonary fibrosis || id:finn-b-IPF	Idiopathic pulmonary fibrosis	Idiopathic pulmonary fibrosis || ||	TRUE	igd	3	18209017	0.00682412	4.88569e-12	MMP1	9.77237e-12	TRUE	inferred	yjkEyB	2	1	TRUE
rs79977579	A	C	A	C	0.0934783	0.1051	0.0944033	0.09363	FALSE	FALSE	FALSE	finn-b-IPF	12	54694560	0.0788	NA	0.1824	Idiopathic pulmonary fibrosis || id:finn-b-IPF	Idiopathic pulmonary fibrosis	Idiopathic pulmonary fibrosis || ||	TRUE	igd	12	54300776	0.00947301	2.86889e-23	MMP1	5.73852e-23	TRUE	inferred	yjkEyB	2	1	TRUE
rs8026714	A	G	A	G	-0.0583976	0.1069	0.136233	0.1501	FALSE	FALSE	FALSE	finn-b-IPF	15	91522253	0.0633	NA	0.0914408	Idiopathic pulmonary fibrosis || id:finn-b-IPF	Idiopathic pulmonary fibrosis	Idiopathic pulmonary fibrosis || ||	TRUE	igd	15	90979023	0.00802045	1.6557e-13	MMP1	3.31131e-13	TRUE	inferred	yjkEyB	2	1	TRUE
rs892090	G	T	G	T	0.105211	-0.0531	0.831912	0.8786	FALSE	FALSE	FALSE	finn-b-IPF	19	55539072	0.0699	NA	0.4473	Idiopathic pulmonary fibrosis || id:finn-b-IPF	Idiopathic pulmonary fibrosis	Idiopathic pulmonary fibrosis || ||	TRUE	igd	19	55027704	0.00737213	1.64821e-46	MMP1	3.29686e-46	TRUE	inferred	yjkEyB	2	1	TRUE
rs9985030	A	G	A	G	-0.0673569	0.0293	0.0841956	0.05446	FALSE	FALSE	FALSE	finn-b-IPF	21	36429268	0.1009	NA	0.7712	Idiopathic pulmonary fibrosis || id:finn-b-IPF	Idiopathic pulmonary fibrosis	Idiopathic pulmonary fibrosis || ||	TRUE	igd	21	35056971	0.00994793	6.39714e-12	MMP1	1.27938e-11	TRUE	inferred	yjkEyB	2	1	TRUE
rs10016018	T	A	T	A	-0.0491475	-0.0717	0.40041	0.4449	FALSE	TRUE	TRUE	finn-b-IPF	4	102794621	0.0458	NA	0.1176	Idiopathic pulmonary fibrosis || id:finn-b-IPF	Idiopathic pulmonary fibrosis	Idiopathic pulmonary fibrosis || ||	TRUE	igd	4	101873464	0.00612245	4.97704e-16	SERPINE1	9.95405e-16	TRUE	inferred	O6bYcf	2	1	FALSE
rs1050316	T	G	T	G	-0.0588129	-0.09	0.643226	0.5808	FALSE	FALSE	FALSE	finn-b-IPF	1	156434703	0.046	NA	0.0501003	Idiopathic pulmonary fibrosis || id:finn-b-IPF	Idiopathic pulmonary fibrosis	Idiopathic pulmonary fibrosis || ||	TRUE	igd	1	156464911	0.00630971	5.76164e-21	SERPINE1	1.15239e-20	TRUE	inferred	O6bYcf	2	1	TRUE
rs114694170	C	T	C	T	0.141887	-0.1387	0.0560047	0.0558	FALSE	FALSE	FALSE	finn-b-IPF	5	88180196	0.0985	NA	0.1591	Idiopathic pulmonary fibrosis || id:finn-b-IPF	Idiopathic pulmonary fibrosis	Idiopathic pulmonary fibrosis || ||	TRUE	igd	5	88884379	0.0131845	2.61127e-27	SERPINE1	5.22396e-27	TRUE	inferred	O6bYcf	2	1	TRUE
rs11794772	A	G	A	G	-0.0568183	-0.0197	0.258122	0.2724	FALSE	FALSE	FALSE	finn-b-IPF	9	99118445	0.0514	NA	0.7013	Idiopathic pulmonary fibrosis || id:finn-b-IPF	Idiopathic pulmonary fibrosis	Idiopathic pulmonary fibrosis || ||	TRUE	igd	9	96356163	0.00686291	6.20866e-17	SERPINE1	1.24165e-16	TRUE	inferred	O6bYcf	2	1	TRUE
rs12445050	T	C	T	C	0.0868502	-0.0096	0.133949	0.1294	FALSE	FALSE	FALSE	finn-b-IPF	16	81870969	0.0676	NA	0.8876	Idiopathic pulmonary fibrosis || id:finn-b-IPF	Idiopathic pulmonary fibrosis	Idiopathic pulmonary fibrosis || ||	TRUE	igd	16	81837364	0.00880768	3.07984e-23	SERPINE1	6.16027e-23	TRUE	inferred	O6bYcf	2	1	TRUE
rs13236689	G	T	G	T	0.0580785	-0.1072	0.416968	0.4368	FALSE	FALSE	FALSE	finn-b-IPF	7	80236014	0.0458	NA	0.0191298	Idiopathic pulmonary fibrosis || id:finn-b-IPF	Idiopathic pulmonary fibrosis	Idiopathic pulmonary fibrosis || ||	TRUE	igd	7	80606698	0.00608727	7.07468e-22	SERPINE1	1.41482e-21	TRUE	inferred	O6bYcf	2	1	TRUE
rs13412535	A	G	A	G	-0.0607397	-0.0447	0.222244	0.2055	FALSE	FALSE	FALSE	finn-b-IPF	2	224874874	0.0571	NA	0.4345	Idiopathic pulmonary fibrosis || id:finn-b-IPF	Idiopathic pulmonary fibrosis	Idiopathic pulmonary fibrosis || ||	TRUE	igd	2	224010157	0.00722805	2.16994e-17	SERPINE1	4.3391e-17	TRUE	inferred	O6bYcf	2	1	TRUE
rs1354034	C	T	C	T	-0.117281	-0.0507	0.589112	0.7066	FALSE	FALSE	FALSE	finn-b-IPF	3	56849749	0.0501	NA	0.3123	Idiopathic pulmonary fibrosis || id:finn-b-IPF	Idiopathic pulmonary fibrosis	Idiopathic pulmonary fibrosis || ||	TRUE	igd	3	56815721	0.0061245	4.88775e-82	SERPINE1	9.78588e-82	TRUE	inferred	O6bYcf	2	1	TRUE
rs151234	C	G	C	G	0.0624291	-0.0044	0.132352	0.1239	FALSE	TRUE	FALSE	finn-b-IPF	16	28505660	0.069	NA	0.9489	Idiopathic pulmonary fibrosis || id:finn-b-IPF	Idiopathic pulmonary fibrosis	Idiopathic pulmonary fibrosis || ||	TRUE	igd	16	28494339	0.00891196	1.23412e-12	SERPINE1	2.46831e-12	TRUE	inferred	O6bYcf	2	1	TRUE
rs2227674	G	A	G	A	-0.10871	-0.0707	0.210242	0.1791	FALSE	FALSE	FALSE	finn-b-IPF	7	100776208	0.0594	NA	0.234	Idiopathic pulmonary fibrosis || id:finn-b-IPF	Idiopathic pulmonary fibrosis	Idiopathic pulmonary fibrosis || ||	TRUE	igd	7	101132927	0.00744994	1.57753e-48	SERPINE1	3.15355e-48	TRUE	inferred	O6bYcf	2	1	TRUE
rs2522051	C	T	C	T	0.055101	0.0383	0.459451	0.579	FALSE	FALSE	FALSE	finn-b-IPF	5	131797578	0.046	NA	0.4049	Idiopathic pulmonary fibrosis || id:finn-b-IPF	Idiopathic pulmonary fibrosis	Idiopathic pulmonary fibrosis || ||	TRUE	igd	5	132461886	0.00606547	5.21484e-20	SERPINE1	1.04304e-19	TRUE	inferred	O6bYcf	2	1	TRUE
rs3002416	T	C	T	C	-0.0406822	-0.0201	0.408382	0.3744	FALSE	FALSE	FALSE	finn-b-IPF	X	39710195	0.0374	NA	0.59	Idiopathic pulmonary fibrosis || id:finn-b-IPF	Idiopathic pulmonary fibrosis	Idiopathic pulmonary fibrosis || ||	TRUE	igd	23	39850941	0.00528015	6.55533e-15	SERPINE1	1.31099e-14	TRUE	inferred	O6bYcf	2	1	TRUE
rs34377578	C	A	C	A	0.0756171	0.0627	0.24431	0.1954	FALSE	FALSE	FALSE	finn-b-IPF	10	104336426	0.0573	NA	0.2733	Idiopathic pulmonary fibrosis || id:finn-b-IPF	Idiopathic pulmonary fibrosis	Idiopathic pulmonary fibrosis || ||	TRUE	igd	10	102576669	0.00700938	1.96144e-27	SERPINE1	3.92283e-27	TRUE	inferred	O6bYcf	2	1	TRUE
rs4608137	A	G	A	G	-0.0431326	-0.0966	0.475261	0.4556	FALSE	FALSE	FALSE	finn-b-IPF	12	6293373	0.0457	NA	0.0345001	Idiopathic pulmonary fibrosis || id:finn-b-IPF	Idiopathic pulmonary fibrosis	Idiopathic pulmonary fibrosis || ||	TRUE	igd	12	6184207	0.00603814	4.55388e-13	SERPINE1	9.10752e-13	TRUE	inferred	O6bYcf	2	1	TRUE
rs4827870	A	T	A	T	-0.0484713	-0.0227	0.618734	0.7443	FALSE	TRUE	FALSE	finn-b-IPF	X	99936929	0.0414	NA	0.583899	Idiopathic pulmonary fibrosis || id:finn-b-IPF	Idiopathic pulmonary fibrosis	Idiopathic pulmonary fibrosis || ||	TRUE	igd	23	100681932	0.00514218	2.12575e-21	SERPINE1	4.25109e-21	TRUE	inferred	O6bYcf	2	1	TRUE
rs5980948	T	C	T	C	0.0645059	-0.0114	0.19448	0.2875	FALSE	FALSE	FALSE	finn-b-IPF	X	69701403	0.0395	NA	0.772601	Idiopathic pulmonary fibrosis || id:finn-b-IPF	Idiopathic pulmonary fibrosis	Idiopathic pulmonary fibrosis || ||	TRUE	igd	23	70481553	0.00626407	3.60599e-25	SERPINE1	7.21274e-25	TRUE	inferred	O6bYcf	2	1	TRUE
rs60757417	G	C	G	C	-0.146052	-0.035	0.0624353	0.0957	FALSE	TRUE	FALSE	finn-b-IPF	9	135864436	0.0772	NA	0.650801	Idiopathic pulmonary fibrosis || id:finn-b-IPF	Idiopathic pulmonary fibrosis	Idiopathic pulmonary fibrosis || ||	TRUE	igd	9	132989049	0.0125606	1.48855e-31	SERPINE1	2.97577e-31	TRUE	inferred	O6bYcf	2	1	TRUE
rs6081565	A	G	A	G	0.0711309	-0.0299	0.349593	0.2807	FALSE	FALSE	FALSE	finn-b-IPF	20	19287904	0.051	NA	0.5583	Idiopathic pulmonary fibrosis || id:finn-b-IPF	Idiopathic pulmonary fibrosis	Idiopathic pulmonary fibrosis || ||	TRUE	igd	20	19307260	0.00629872	7.1121e-30	SERPINE1	1.42233e-29	TRUE	inferred	O6bYcf	2	1	TRUE
rs61751937	C	G	C	G	0.134132	0.0066	0.0275384	0.04259	FALSE	TRUE	FALSE	finn-b-IPF	9	113312231	0.1125	NA	0.9531	Idiopathic pulmonary fibrosis || id:finn-b-IPF	Idiopathic pulmonary fibrosis	Idiopathic pulmonary fibrosis || ||	TRUE	igd	9	110549951	0.0182432	9.73118e-14	SERPINE1	1.94626e-13	TRUE	inferred	O6bYcf	2	1	TRUE
rs61978213	A	G	A	G	0.131774	-0.0726	0.0401553	0.01787	FALSE	FALSE	FALSE	finn-b-IPF	14	70653758	0.1769	NA	0.6815	Idiopathic pulmonary fibrosis || id:finn-b-IPF	Idiopathic pulmonary fibrosis	Idiopathic pulmonary fibrosis || ||	TRUE	igd	14	70187041	0.0151784	1.94984e-18	SERPINE1	3.90032e-18	TRUE	inferred	O6bYcf	2	1	TRUE
rs6580981	A	G	A	G	0.0565324	-0.0049	0.476149	0.581	FALSE	FALSE	FALSE	finn-b-IPF	12	54723028	0.0464	NA	0.9159	Idiopathic pulmonary fibrosis || id:finn-b-IPF	Idiopathic pulmonary fibrosis	Idiopathic pulmonary fibrosis || ||	TRUE	igd	12	54329244	0.00610895	1.08093e-20	SERPINE1	2.16172e-20	TRUE	inferred	O6bYcf	2	1	TRUE
rs6993770	T	A	T	A	-0.15157	0.0186	0.291855	0.2229	FALSE	TRUE	FALSE	finn-b-IPF	8	106581528	0.0552	NA	0.736801	Idiopathic pulmonary fibrosis || id:finn-b-IPF	Idiopathic pulmonary fibrosis	Idiopathic pulmonary fibrosis || ||	TRUE	igd	8	105569300	0.00659458	3.36727e-117	SERPINE1	6.72977e-117	TRUE	inferred	O6bYcf	2	1	TRUE
rs7618405	A	C	A	C	-0.0640182	0.0004	0.204005	0.2101	FALSE	FALSE	FALSE	finn-b-IPF	3	18250509	0.0559	NA	0.994	Idiopathic pulmonary fibrosis || id:finn-b-IPF	Idiopathic pulmonary fibrosis	Idiopathic pulmonary fibrosis || ||	TRUE	igd	3	18209017	0.00747556	5.46671e-18	SERPINE1	1.0932e-17	TRUE	inferred	O6bYcf	2	1	TRUE
rs78909033	A	G	A	G	-0.089021	0.1132	0.128784	0.1301	FALSE	FALSE	FALSE	finn-b-IPF	2	241510903	0.0685	NA	0.0984192	Idiopathic pulmonary fibrosis || id:finn-b-IPF	Idiopathic pulmonary fibrosis	Idiopathic pulmonary fibrosis || ||	TRUE	igd	2	240571486	0.00897003	1.63241e-23	SERPINE1	3.26513e-23	TRUE	inferred	O6bYcf	2	1	TRUE
rs7896897	A	G	A	G	0.0444943	0.075	0.330269	0.2836	FALSE	FALSE	FALSE	finn-b-IPF	10	3140734	0.0514	NA	0.1444	Idiopathic pulmonary fibrosis || id:finn-b-IPF	Idiopathic pulmonary fibrosis	Idiopathic pulmonary fibrosis || ||	TRUE	igd	10	3098542	0.00646686	2.98516e-12	SERPINE1	5.97035e-12	TRUE	inferred	O6bYcf	2	1	TRUE
rs892090	G	T	G	T	0.149138	-0.0531	0.831894	0.8786	FALSE	FALSE	FALSE	finn-b-IPF	19	55539072	0.0699	NA	0.4473	Idiopathic pulmonary fibrosis || id:finn-b-IPF	Idiopathic pulmonary fibrosis	Idiopathic pulmonary fibrosis || ||	TRUE	igd	19	55027704	0.00806112	1.01522e-76	SERPINE1	2.03002e-76	TRUE	inferred	O6bYcf	2	1	TRUE
rs9378249	G	T	G	T	-0.0864297	-0.0483	0.0623115	0.1315	FALSE	FALSE	FALSE	finn-b-IPF	6	31327701	0.0676	NA	0.4751	Idiopathic pulmonary fibrosis || id:finn-b-IPF	Idiopathic pulmonary fibrosis	Idiopathic pulmonary fibrosis || ||	TRUE	igd	6	31359924	0.0124086	1.63845e-12	SERPINE1	3.27718e-12	TRUE	inferred	O6bYcf	2	1	TRUE
rs1070073	G	T	G	T	0.128552	-0.0038	0.681159	0.6621	FALSE	FALSE	FALSE	finn-b-IPF	12	104000319	0.0481	NA	0.9371	Idiopathic pulmonary fibrosis || id:finn-b-IPF	Idiopathic pulmonary fibrosis	Idiopathic pulmonary fibrosis || ||	TRUE	igd	12	103606541	0.00635417	2.60509e-91	PDGFRA	5.20955e-91	TRUE	inferred	61BtBW	2	1	TRUE
rs11260029	C	T	C	T	-0.0465225	-0.0711	0.274896	0.2903	FALSE	FALSE	FALSE	finn-b-IPF	19	7827576	0.0507	NA	0.1604	Idiopathic pulmonary fibrosis || id:finn-b-IPF	Idiopathic pulmonary fibrosis	Idiopathic pulmonary fibrosis || ||	TRUE	igd	19	7762690	0.00660463	9.34513e-13	PDGFRA	1.86896e-12	TRUE	inferred	61BtBW	2	1	TRUE
rs12592898	G	A	G	A	-0.0662065	-0.0121	0.868327	0.8556	FALSE	FALSE	FALSE	finn-b-IPF	15	79229199	0.0648	NA	0.8521	Idiopathic pulmonary fibrosis || id:finn-b-IPF	Idiopathic pulmonary fibrosis	Idiopathic pulmonary fibrosis || ||	TRUE	igd	15	78936857	0.00869325	1.30979e-14	PDGFRA	2.61939e-14	TRUE	inferred	61BtBW	2	1	TRUE
rs186021206	A	G	A	G	0.348644	-0.523	0.00603624	0.004085	FALSE	FALSE	FALSE	finn-b-IPF	17	7069412	0.3791	NA	0.1677	Idiopathic pulmonary fibrosis || id:finn-b-IPF	Idiopathic pulmonary fibrosis	Idiopathic pulmonary fibrosis || ||	TRUE	igd	17	7166093	0.0414211	1.9302e-17	PDGFRA	3.86011e-17	TRUE	inferred	61BtBW	2	1	TRUE
rs35597368	C	T	C	T	-0.425154	-0.0645	0.114406	0.1187	FALSE	FALSE	FALSE	finn-b-IPF	4	55139771	0.0698	NA	0.3552	Idiopathic pulmonary fibrosis || id:finn-b-IPF	Idiopathic pulmonary fibrosis	Idiopathic pulmonary fibrosis || ||	TRUE	igd	4	54273604	0.00936027	0	PDGFRA	0	TRUE	inferred	61BtBW	2	1	TRUE
rs36024818	ATCTT	A	ATCTT	A	0.0841136	0.0998	0.363262	0.2474	FALSE	FALSE	FALSE	finn-b-IPF	3	58399338	0.053	NA	0.0596403	Idiopathic pulmonary fibrosis || id:finn-b-IPF	Idiopathic pulmonary fibrosis	Idiopathic pulmonary fibrosis || ||	TRUE	igd	3	58413611	0.00613311	4.14696e-43	PDGFRA	8.29469e-43	TRUE	inferred	61BtBW	2	1	TRUE
rs3762654	G	A	G	A	-0.0444105	0.0103	0.660018	0.6966	FALSE	FALSE	FALSE	finn-b-IPF	3	98305560	0.0496	NA	0.836	Idiopathic pulmonary fibrosis || id:finn-b-IPF	Idiopathic pulmonary fibrosis	Idiopathic pulmonary fibrosis || ||	TRUE	igd	3	98586716	0.00616271	2.87408e-13	PDGFRA	5.7491e-13	TRUE	inferred	61BtBW	2	1	TRUE
rs6913664	T	C	T	C	0.0566476	-0.0108	0.483115	0.5337	FALSE	FALSE	FALSE	finn-b-IPF	6	32295874	0.0465	NA	0.817	Idiopathic pulmonary fibrosis || id:finn-b-IPF	Idiopathic pulmonary fibrosis	Idiopathic pulmonary fibrosis || ||	TRUE	igd	6	32328097	0.00586838	2.38641e-22	PDGFRA	4.77309e-22	TRUE	inferred	61BtBW	2	1	TRUE
rs738408	T	C	T	C	0.0543939	-0.0271	0.214642	0.2264	FALSE	FALSE	FALSE	finn-b-IPF	22	44324730	0.0545	NA	0.619599	Idiopathic pulmonary fibrosis || id:finn-b-IPF	Idiopathic pulmonary fibrosis	Idiopathic pulmonary fibrosis || ||	TRUE	igd	22	43928850	0.00707763	7.63034e-15	PDGFRA	1.52616e-14	TRUE	inferred	61BtBW	2	1	TRUE
rs8134160	T	A	T	A	0.0446932	-0.0047	0.274852	0.2589	FALSE	TRUE	FALSE	finn-b-IPF	21	42541202	0.0522	NA	0.9288	Idiopathic pulmonary fibrosis || id:finn-b-IPF	Idiopathic pulmonary fibrosis	Idiopathic pulmonary fibrosis || ||	TRUE	igd	21	41169275	0.00661889	7.27243e-12	PDGFRA	1.45445e-11	TRUE	inferred	61BtBW	2	1	TRUE
rs887048	C	T	C	T	0.0427824	0.0153	0.603842	0.4726	FALSE	FALSE	FALSE	finn-b-IPF	7	76060235	0.0459	NA	0.7391	Idiopathic pulmonary fibrosis || id:finn-b-IPF	Idiopathic pulmonary fibrosis	Idiopathic pulmonary fibrosis || ||	TRUE	igd	7	76430918	0.00594864	3.19331e-13	PDGFRA	6.38705e-13	TRUE	inferred	61BtBW	2	1	TRUE
rs1354034	C	T	C	T	0.0533567	-0.0507	0.588576	0.7066	FALSE	FALSE	FALSE	finn-b-IPF	3	56849749	0.0501	NA	0.3123	Idiopathic pulmonary fibrosis || id:finn-b-IPF	Idiopathic pulmonary fibrosis	Idiopathic pulmonary fibrosis || ||	TRUE	igd	3	56815721	0.00625658	7.43896e-18	NFKB1	1.48765e-17	TRUE	inferred	WsmYaa	2	1	TRUE
rs230509	A	G	A	G	-0.119493	-0.0307	0.663425	0.6509	FALSE	FALSE	FALSE	finn-b-IPF	4	103478265	0.0477	NA	0.519501	Idiopathic pulmonary fibrosis || id:finn-b-IPF	Idiopathic pulmonary fibrosis	Idiopathic pulmonary fibrosis || ||	TRUE	igd	4	102557108	0.00654372	8.50263e-75	NFKB1	1.70177e-74	TRUE	inferred	WsmYaa	2	1	TRUE
rs342293	G	C	G	C	-0.0441637	-0.0224	0.45432	0.4813	FALSE	TRUE	TRUE	finn-b-IPF	7	106372219	0.0454	NA	0.6223	Idiopathic pulmonary fibrosis || id:finn-b-IPF	Idiopathic pulmonary fibrosis	Idiopathic pulmonary fibrosis || ||	TRUE	igd	7	106731773	0.00613646	3.07907e-13	NFKB1	6.15886e-13	TRUE	inferred	WsmYaa	2	1	FALSE
rs6580981	A	G	A	G	0.0507117	-0.0049	0.476524	0.581	FALSE	FALSE	FALSE	finn-b-IPF	12	54723028	0.0464	NA	0.9159	Idiopathic pulmonary fibrosis || id:finn-b-IPF	Idiopathic pulmonary fibrosis	Idiopathic pulmonary fibrosis || ||	TRUE	igd	12	54329244	0.00626303	2.81675e-16	NFKB1	5.63378e-16	TRUE	inferred	WsmYaa	2	1	TRUE
rs1049728	C	G	C	G	-0.167984	-0.0474	0.0573673	0.1243	FALSE	TRUE	FALSE	finn-b-IPF	11	65421117	0.0682	NA	0.4872	Idiopathic pulmonary fibrosis || id:finn-b-IPF	Idiopathic pulmonary fibrosis	Idiopathic pulmonary fibrosis || ||	TRUE	igd	11	65653646	0.0122915	8.02773e-43	ICAM1	1.6062e-42	TRUE	inferred	SVayis	2	1	TRUE
rs186021206	A	G	A	G	0.599872	-0.523	0.00602626	0.004085	FALSE	FALSE	FALSE	finn-b-IPF	17	7069412	0.3791	NA	0.1677	Idiopathic pulmonary fibrosis || id:finn-b-IPF	Idiopathic pulmonary fibrosis	Idiopathic pulmonary fibrosis || ||	TRUE	igd	17	7166093	0.03981	1.30733e-51	ICAM1	2.61517e-51	TRUE	inferred	SVayis	2	1	TRUE
rs3136642	G	A	G	A	-0.0557414	0.0333	0.371438	0.4239	FALSE	FALSE	FALSE	finn-b-IPF	19	39398416	0.0464	NA	0.4727	Idiopathic pulmonary fibrosis || id:finn-b-IPF	Idiopathic pulmonary fibrosis	Idiopathic pulmonary fibrosis || ||	TRUE	igd	19	38907776	0.00629751	4.32375e-19	ICAM1	8.64769e-19	TRUE	inferred	SVayis	2	1	TRUE
rs3184504	C	T	C	T	-0.0818071	-0.0885	0.539105	0.593	FALSE	FALSE	FALSE	finn-b-IPF	12	111884608	0.0464	NA	0.0564196	Idiopathic pulmonary fibrosis || id:finn-b-IPF	Idiopathic pulmonary fibrosis	Idiopathic pulmonary fibrosis || ||	TRUE	igd	12	111446804	0.00572267	1.17102e-46	ICAM1	2.34207e-46	TRUE	inferred	SVayis	2	1	TRUE
rs5030379	CTTGATTGA	C	GAACT	G	0.413316	0.0368	0.369876	0.3945	TRUE	FALSE	FALSE	finn-b-IPF	19	10393605	0.0468	NA	0.4312	Idiopathic pulmonary fibrosis || id:finn-b-IPF	Idiopathic pulmonary fibrosis	Idiopathic pulmonary fibrosis || ||	TRUE	igd	19	10282929	0.00627133	0	ICAM1	0	TRUE	inferred	SVayis	2	1	FALSE
rs1800783	T	A	T	A	0.0479463	-0.0145	0.619559	0.6641	FALSE	TRUE	FALSE	finn-b-IPF	7	150689397	0.0484	NA	0.7647	Idiopathic pulmonary fibrosis || id:finn-b-IPF	Idiopathic pulmonary fibrosis	Idiopathic pulmonary fibrosis || ||	TRUE	igd	7	150992309	0.00630496	1.42963e-14	NOS3	2.85957e-14	TRUE	inferred	KN2VmP	2	1	TRUE
rs1864163	A	G	A	G	0.0472306	-0.0115	0.261517	0.2079	FALSE	FALSE	FALSE	finn-b-IPF	16	56997233	0.0562	NA	0.8383	Idiopathic pulmonary fibrosis || id:finn-b-IPF	Idiopathic pulmonary fibrosis	Idiopathic pulmonary fibrosis || ||	TRUE	igd	16	56963321	0.00691844	4.34238e-12	NOS3	8.6836e-12	TRUE	inferred	KN2VmP	2	1	TRUE
rs3184504	C	T	C	T	-0.050065	-0.0885	0.538925	0.593	FALSE	FALSE	FALSE	finn-b-IPF	12	111884608	0.0464	NA	0.0564196	Idiopathic pulmonary fibrosis || id:finn-b-IPF	Idiopathic pulmonary fibrosis	Idiopathic pulmonary fibrosis || ||	TRUE	igd	12	111446804	0.00619519	3.2048e-16	NOS3	6.40914e-16	TRUE	inferred	KN2VmP	2	1	TRUE
rs529565	C	T	C	T	0.0628957	-0.0088	0.324524	0.4344	FALSE	FALSE	FALSE	finn-b-IPF	9	136149500	0.0459	NA	0.8476	Idiopathic pulmonary fibrosis || id:finn-b-IPF	Idiopathic pulmonary fibrosis	Idiopathic pulmonary fibrosis || ||	TRUE	igd	9	133274084	0.00648573	1.5441e-22	NOS3	3.08816e-22	TRUE	inferred	KN2VmP	2	1	TRUE
rs6415128	A	G	A	G	0.0509559	-0.0392	0.565096	0.658	FALSE	FALSE	FALSE	finn-b-IPF	6	32330894	0.053	NA	0.4594	Idiopathic pulmonary fibrosis || id:finn-b-IPF	Idiopathic pulmonary fibrosis	Idiopathic pulmonary fibrosis || ||	TRUE	igd	6	32363117	0.00614556	5.59154e-17	NOS3	1.11841e-16	TRUE	inferred	KN2VmP	2	1	TRUE
rs7572209	C	T	C	T	-0.079465	0.0229	0.19674	0.2581	FALSE	FALSE	FALSE	finn-b-IPF	2	86090072	0.0525	NA	0.6625	Idiopathic pulmonary fibrosis || id:finn-b-IPF	Idiopathic pulmonary fibrosis	Idiopathic pulmonary fibrosis || ||	TRUE	igd	2	85862949	0.00767173	1.92143e-25	NOS3	3.84238e-25	TRUE	inferred	KN2VmP	2	1	TRUE
rs4986791	T	C	T	C	-0.330605	0.0391	0.0614398	0.1017	FALSE	FALSE	FALSE	finn-b-IPF	9	120475602	0.0765	NA	0.6097	Idiopathic pulmonary fibrosis || id:finn-b-IPF	Idiopathic pulmonary fibrosis	Idiopathic pulmonary fibrosis || ||	TRUE	igd	9	117713324	0.0131308	3.50424e-140	TLR4	7.01455e-140	TRUE	inferred	cQEHpx	2	1	TRUE
rs635634	T	C	T	C	-0.0886011	0.0884	0.182019	0.2001	FALSE	FALSE	FALSE	finn-b-IPF	9	136155000	0.057	NA	0.1209	Idiopathic pulmonary fibrosis || id:finn-b-IPF	Idiopathic pulmonary fibrosis	Idiopathic pulmonary fibrosis || ||	TRUE	igd	9	133279427	0.00819781	1.57911e-27	TLR4	3.15791e-27	TRUE	inferred	cQEHpx	2	1	TRUE

## Sheet: Table S5
outcome	exposure	method	nsnp	b	se	pval	lo_ci	up_ci	or	or_lci95	or_uci95
Postinflammatory pulmonary fibrosis	ICAM1	Inverse variance weighted	5	0.725732	0.294051	0.0135853	0.149392	1.30207	2.06624	1.16113	3.67691
Postinflammatory pulmonary fibrosis	NFKB1	Inverse variance weighted	3	0.810329	0.353259	0.0217982	0.117941	1.50272	2.24865	1.12518	4.49388
Pulmonary fibrosis || id:ebi-a-GCST90018908	NFKB1	Inverse variance weighted	3	0.477141	0.257984	0.0643861	-0.0285081	0.98279	1.61146	0.971894	2.6719
Pulmonary fibrosis || id:ebi-a-GCST90018908	ICAM1	Inverse variance weighted	6	0.159267	0.0980399	0.104266	-0.0328912	0.351425	1.17265	0.967644	1.42109
Pulmonary fibrosis || id:ebi-a-GCST90018908	TLR4	Inverse variance weighted	2	-0.248412	0.197533	0.208547	-0.635578	0.138753	0.780038	0.529629	1.14884
Pulmonary fibrosis || id:ebi-a-GCST90018908	NOS3	Inverse variance weighted	8	-0.300954	0.270245	0.265435	-0.830634	0.228725	0.740112	0.435773	1.257
Idiopathic pulmonary fibrosis || id:finn-b-IPF	PDGFRA	Inverse variance weighted	12	0.140318	0.134767	0.297788	-0.123826	0.404461	1.15064	0.883534	1.4985
Idiopathic pulmonary fibrosis || id:finn-b-IPF	SERPINE1	Inverse variance weighted	28	0.130585	0.141619	0.356484	-0.146988	0.408157	1.13949	0.863304	1.50404
Postinflammatory pulmonary fibrosis	MMP1	Inverse variance weighted	23	0.0838974	0.0931574	0.367802	-0.0986911	0.266486	1.08752	0.906023	1.30537
Idiopathic pulmonary fibrosis || id:finn-b-IPF	TLR4	Inverse variance weighted	2	-0.219011	0.28009	0.434256	-0.767987	0.329965	0.803313	0.463946	1.39092
Pulmonary fibrosis || id:ebi-a-GCST90018908	SERPINE1	Inverse variance weighted	28	0.0847088	0.110963	0.445228	-0.132779	0.302197	1.0884	0.875658	1.35283
Postinflammatory pulmonary fibrosis	SERPINE1	Inverse variance weighted	25	-0.0869675	0.141698	0.539379	-0.364696	0.190761	0.916707	0.694408	1.21017
Idiopathic pulmonary fibrosis || id:finn-b-IPF	NOS3	Inverse variance weighted	7	0.269886	0.450749	0.54934	-0.613582	1.15335	1.30981	0.541408	3.1688
Idiopathic pulmonary fibrosis || id:finn-b-IPF	MMP1	Inverse variance weighted	27	-0.048687	0.0868149	0.574925	-0.218844	0.12147	0.952479	0.803447	1.12916
Pulmonary fibrosis || id:ebi-a-GCST90018908	PDGFRA	Inverse variance weighted	12	-0.0649111	0.133188	0.625999	-0.325959	0.196137	0.937151	0.721835	1.21669
Postinflammatory pulmonary fibrosis	NOS3	Inverse variance weighted	7	-0.20576	0.466228	0.658974	-1.11957	0.708046	0.814028	0.326421	2.03002
Pulmonary fibrosis || id:ebi-a-GCST90018908	MMP1	Inverse variance weighted	32	-0.0264778	0.0671828	0.693496	-0.158156	0.105201	0.97387	0.853717	1.11093
Idiopathic pulmonary fibrosis || id:finn-b-IPF	ICAM1	Inverse variance weighted	4	0.154661	0.397663	0.697332	-0.624758	0.93408	1.16726	0.535391	2.54487
Postinflammatory pulmonary fibrosis	PDGFRA	Inverse variance weighted	9	-0.0558434	0.174065	0.748348	-0.397012	0.285325	0.945687	0.672326	1.33019
Postinflammatory pulmonary fibrosis	TLR4	Inverse variance weighted	2	-0.0753383	0.432175	0.861611	-0.922402	0.771725	0.92743	0.397563	2.1635
Idiopathic pulmonary fibrosis || id:finn-b-IPF	NFKB1	Inverse variance weighted	3	0.0487108	0.340914	0.886382	-0.61948	0.716902	1.04992	0.538224	2.04808

## Sheet: Table S6
outcome	exposure	method	Q	Q_df	Q_pval
Postinflammatory pulmonary fibrosis	PDGFRA	MR Egger	10.1733	7	0.178963
Postinflammatory pulmonary fibrosis	PDGFRA	Inverse variance weighted	10.5184	8	0.230509
Postinflammatory pulmonary fibrosis	TLR4	Inverse variance weighted	2.55111	1	0.110217
Postinflammatory pulmonary fibrosis	NOS3	MR Egger	9.83262	5	0.0801191
Postinflammatory pulmonary fibrosis	NOS3	Inverse variance weighted	10.4118	6	0.108347
Postinflammatory pulmonary fibrosis	SERPINE1	MR Egger	18.1448	23	0.749586
Postinflammatory pulmonary fibrosis	SERPINE1	Inverse variance weighted	23.1292	24	0.512185
Postinflammatory pulmonary fibrosis	ICAM1	MR Egger	0.571687	3	0.902882
Postinflammatory pulmonary fibrosis	ICAM1	Inverse variance weighted	0.802623	4	0.938096
Postinflammatory pulmonary fibrosis	NFKB1	MR Egger	0.16259	1	0.686783
Postinflammatory pulmonary fibrosis	NFKB1	Inverse variance weighted	0.635585	2	0.727754
Postinflammatory pulmonary fibrosis	MMP1	MR Egger	12.1007	21	0.93686
Postinflammatory pulmonary fibrosis	MMP1	Inverse variance weighted	12.1276	22	0.954688
Pulmonary fibrosis || id:ebi-a-GCST90018908	PDGFRA	MR Egger	14.0111	10	0.172487
Pulmonary fibrosis || id:ebi-a-GCST90018908	PDGFRA	Inverse variance weighted	17.8446	11	0.0852562
Idiopathic pulmonary fibrosis || id:finn-b-IPF	PDGFRA	MR Egger	7.48903	9	0.586342
Idiopathic pulmonary fibrosis || id:finn-b-IPF	PDGFRA	Inverse variance weighted	7.63138	10	0.664793
Pulmonary fibrosis || id:ebi-a-GCST90018908	TLR4	Inverse variance weighted	1.07712	1	0.299344
Idiopathic pulmonary fibrosis || id:finn-b-IPF	TLR4	Inverse variance weighted	1.65473	1	0.198317
Pulmonary fibrosis || id:ebi-a-GCST90018908	NOS3	MR Egger	5.83187	6	0.442286
Pulmonary fibrosis || id:ebi-a-GCST90018908	NOS3	Inverse variance weighted	7.88412	7	0.342923
Idiopathic pulmonary fibrosis || id:finn-b-IPF	NOS3	MR Egger	4.19688	4	0.380016
Idiopathic pulmonary fibrosis || id:finn-b-IPF	NOS3	Inverse variance weighted	4.54333	5	0.474107
Pulmonary fibrosis || id:ebi-a-GCST90018908	SERPINE1	MR Egger	25.2116	25	0.450568
Pulmonary fibrosis || id:ebi-a-GCST90018908	SERPINE1	Inverse variance weighted	32.1159	26	0.189316
Idiopathic pulmonary fibrosis || id:finn-b-IPF	SERPINE1	MR Egger	24.8994	24	0.411243
Idiopathic pulmonary fibrosis || id:finn-b-IPF	SERPINE1	Inverse variance weighted	27.8039	25	0.316958
Pulmonary fibrosis || id:ebi-a-GCST90018908	ICAM1	MR Egger	1.45326	4	0.834887
Pulmonary fibrosis || id:ebi-a-GCST90018908	ICAM1	Inverse variance weighted	4.8891	5	0.429564
Idiopathic pulmonary fibrosis || id:finn-b-IPF	ICAM1	MR Egger	5.42707	2	0.0663019
Idiopathic pulmonary fibrosis || id:finn-b-IPF	ICAM1	Inverse variance weighted	6.22536	3	0.101146
Pulmonary fibrosis || id:ebi-a-GCST90018908	NFKB1	MR Egger	0.0527468	1	0.818351
Pulmonary fibrosis || id:ebi-a-GCST90018908	NFKB1	Inverse variance weighted	0.172155	2	0.917523
Idiopathic pulmonary fibrosis || id:finn-b-IPF	NFKB1	MR Egger	0.493994	1	0.482151
Idiopathic pulmonary fibrosis || id:finn-b-IPF	NFKB1	Inverse variance weighted	1.42906	2	0.489422
Pulmonary fibrosis || id:ebi-a-GCST90018908	MMP1	MR Egger	32.4904	30	0.345078
Pulmonary fibrosis || id:ebi-a-GCST90018908	MMP1	Inverse variance weighted	32.7952	31	0.378992
Idiopathic pulmonary fibrosis || id:finn-b-IPF	MMP1	MR Egger	18.7998	23	0.712782
Idiopathic pulmonary fibrosis || id:finn-b-IPF	MMP1	Inverse variance weighted	19.2551	24	0.738253

## Sheet: Table S7
outcome	exposure	egger_intercept	se	pval
Pulmonary fibrosis || id:ebi-a-GCST90018908	PDGFRA	0.0334253	0.0202074	0.129108
Idiopathic pulmonary fibrosis || id:finn-b-IPF	PDGFRA	0.00859575	0.022783	0.714702
Pulmonary fibrosis || id:ebi-a-GCST90018908	TLR4	NA	NA	NA
Idiopathic pulmonary fibrosis || id:finn-b-IPF	TLR4	NA	NA	NA
Pulmonary fibrosis || id:ebi-a-GCST90018908	NOS3	0.0706586	0.049323	0.201956
Idiopathic pulmonary fibrosis || id:finn-b-IPF	NOS3	0.0618771	0.107683	0.596317
Pulmonary fibrosis || id:ebi-a-GCST90018908	SERPINE1	0.0515698	0.0197089	0.0148524
Idiopathic pulmonary fibrosis || id:finn-b-IPF	SERPINE1	0.0451397	0.0269781	0.107274
Pulmonary fibrosis || id:ebi-a-GCST90018908	ICAM1	0.0571661	0.0308406	0.137415
Idiopathic pulmonary fibrosis || id:finn-b-IPF	ICAM1	0.049649	0.0915376	0.641906
Pulmonary fibrosis || id:ebi-a-GCST90018908	NFKB1	0.0182226	0.0527344	0.788191
Idiopathic pulmonary fibrosis || id:finn-b-IPF	NFKB1	-0.0681373	0.0704634	0.510683
Pulmonary fibrosis || id:ebi-a-GCST90018908	MMP1	0.00555541	0.0104716	0.599655
Idiopathic pulmonary fibrosis || id:finn-b-IPF	MMP1	-0.00939954	0.0139303	0.506559
Postinflammatory pulmonary fibrosis	PDGFRA	-0.0156343	0.0320852	0.640953
Postinflammatory pulmonary fibrosis	TLR4	NA	NA	NA
Postinflammatory pulmonary fibrosis	NOS3	0.0738913	0.136154	0.610639
Postinflammatory pulmonary fibrosis	SERPINE1	0.063731	0.0285462	0.0356022
Postinflammatory pulmonary fibrosis	ICAM1	0.0266013	0.055355	0.663698
Postinflammatory pulmonary fibrosis	NFKB1	0.0494297	0.071872	0.616465
Postinflammatory pulmonary fibrosis	MMP1	-0.00267996	0.0163374	0.871269
